# Supplementary material for: Room Temperature Reduction of Titanium Tetrachloride-Activated Nitriles to Primary Amines with Ammonia-Borane
Source: MDPI journal article supplement (doi:10.3390/molecules28010060), 2022-12-21

**SUPPORTING INFORMATION:**

**Room temperature reduction of titanium tetrachloride-activated nitriles to primary amines with ammonia-borane**

P. Veeraraghavan Ramachandran,\* Abdulkhaliq A. Alawaed

† Herbert C. Brown Center for Borane Research, Department of Chemistry, Purdue University,  
West Lafayette, Indiana 47907, United States

*E-mail:* [chandran@purdue.edu](mailto:chandran@purdue.edu)

**Contents:**

|                                     | Page   |
|-------------------------------------|--------|
| NMR spectra of product amines ..... | S2-S29 |

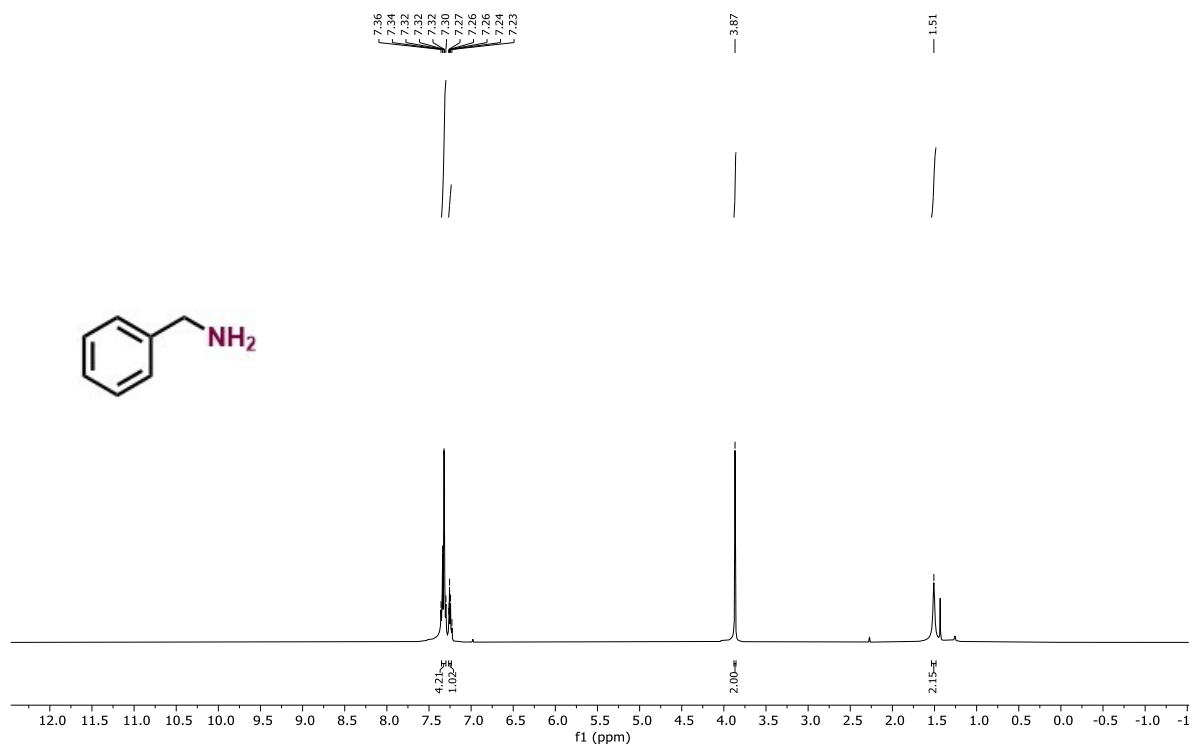

<sup>1</sup>H NMR (400 MHz, CDCl<sub>3</sub>) Benzylamine (**3a**)

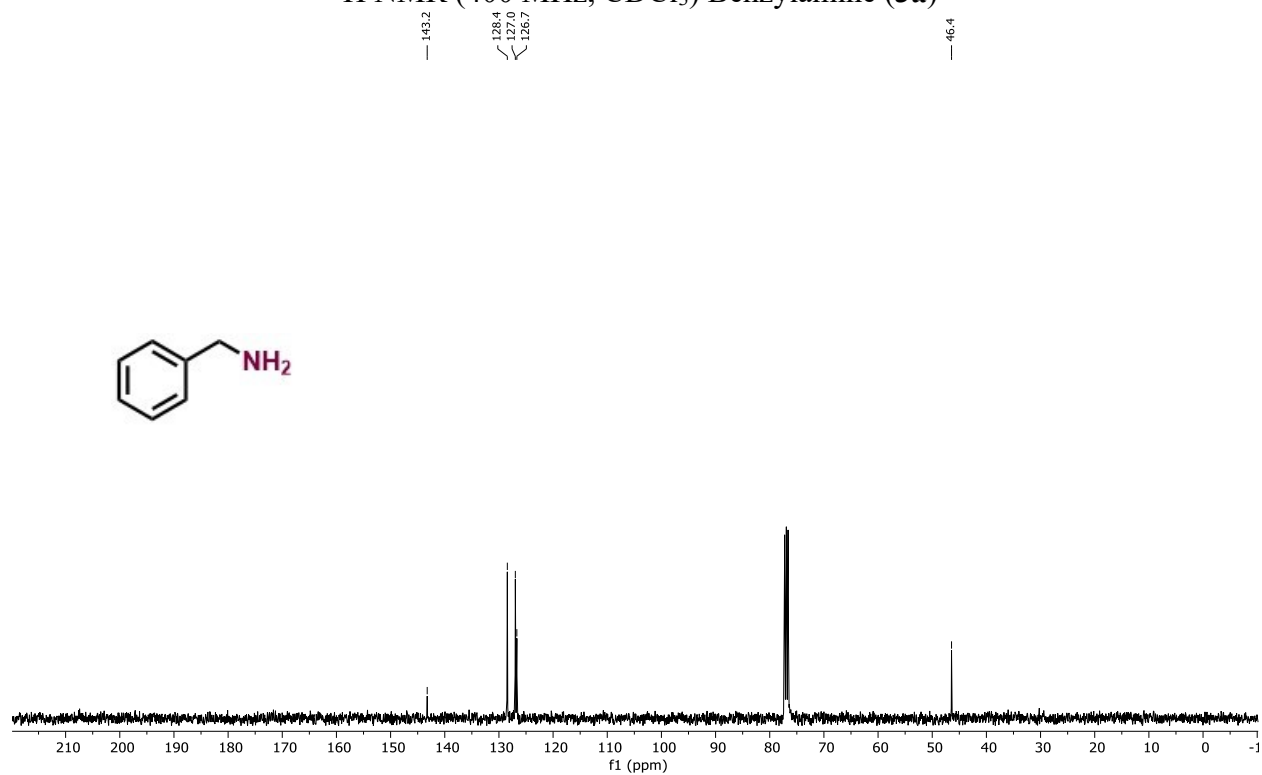

<sup>13</sup>C NMR (101 MHz, CDCl<sub>3</sub>) Benzylamine (**3a**)

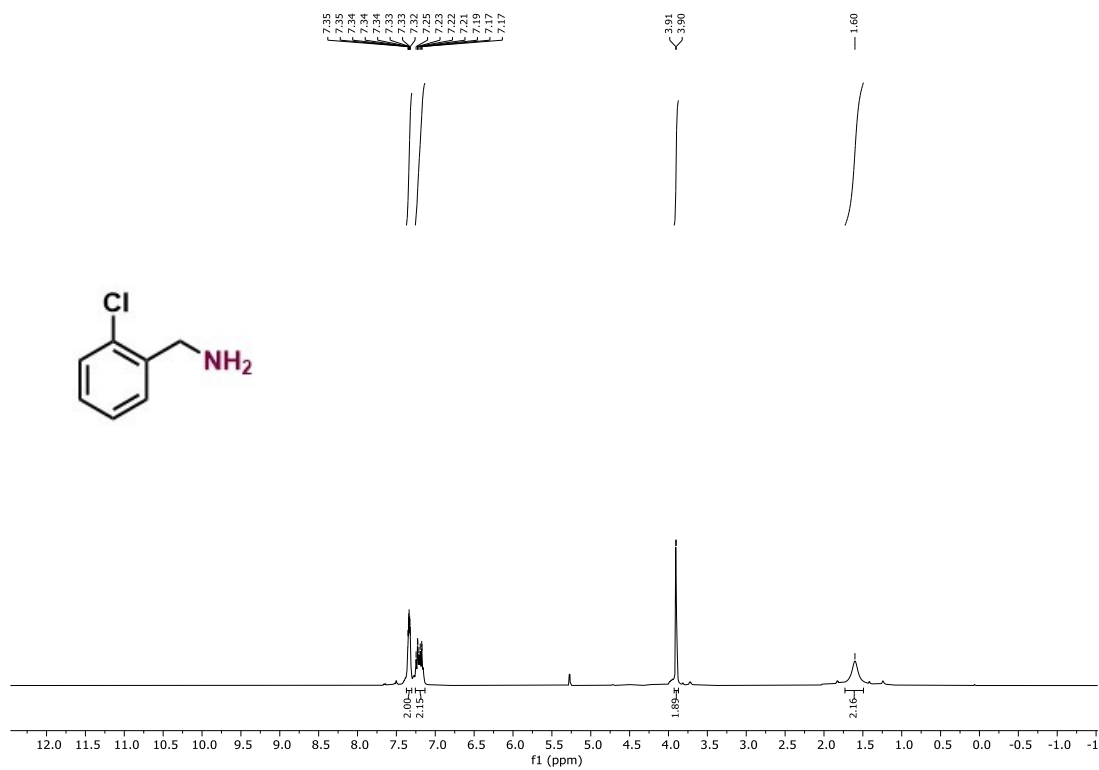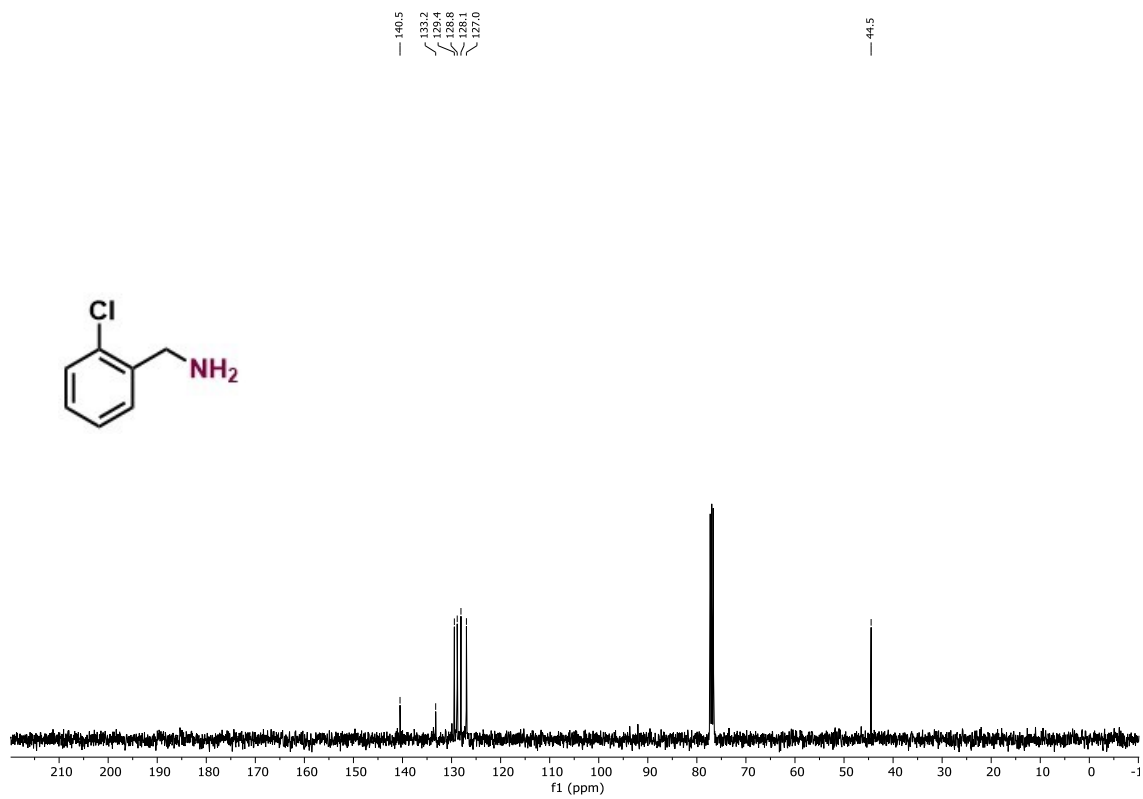

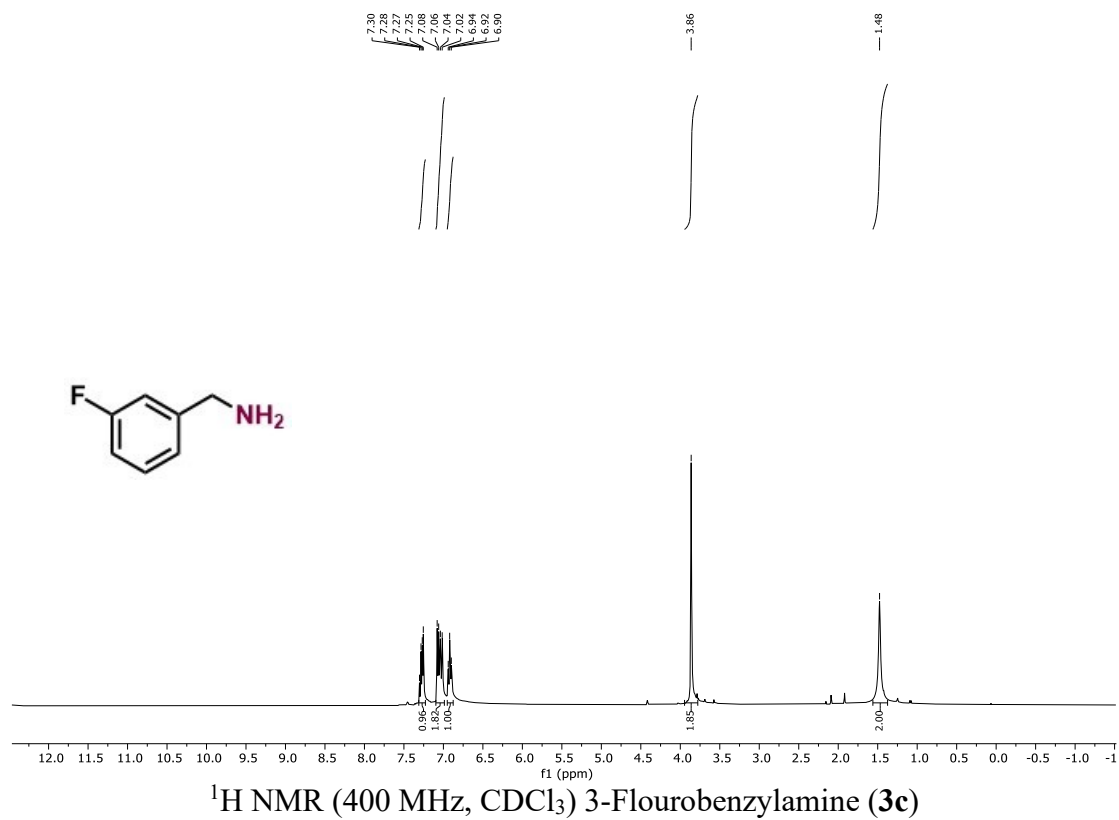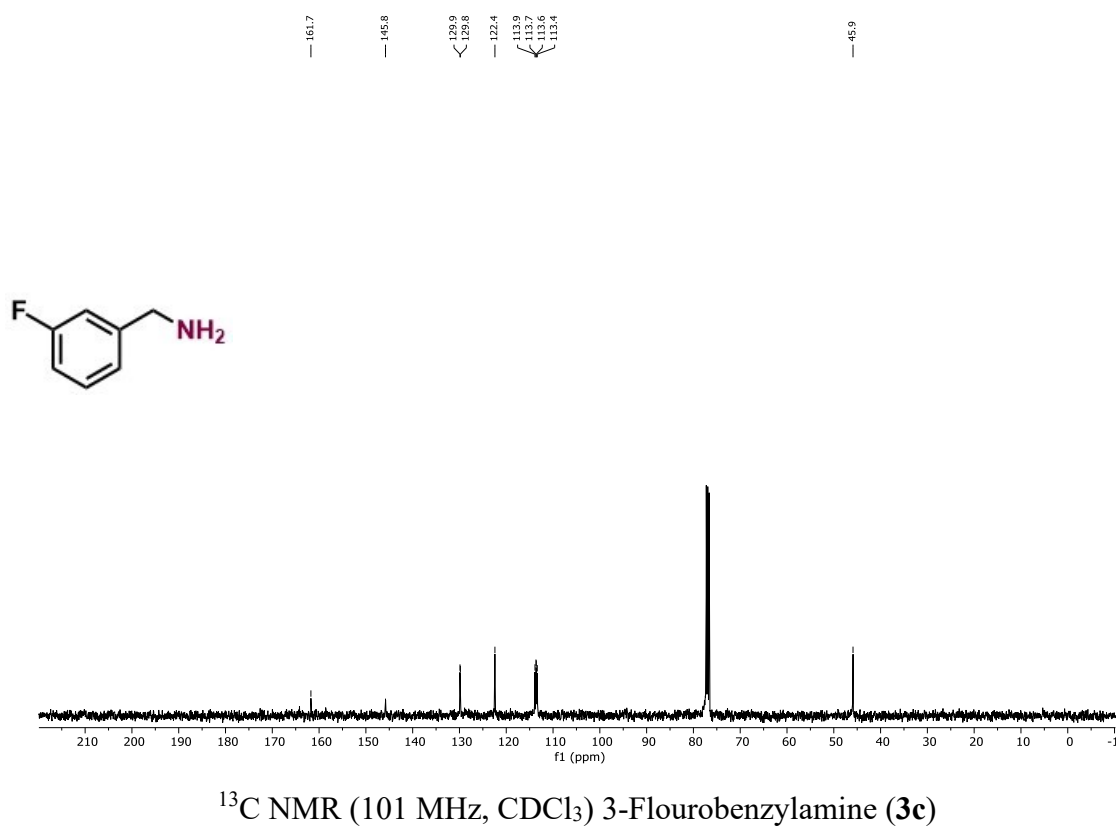

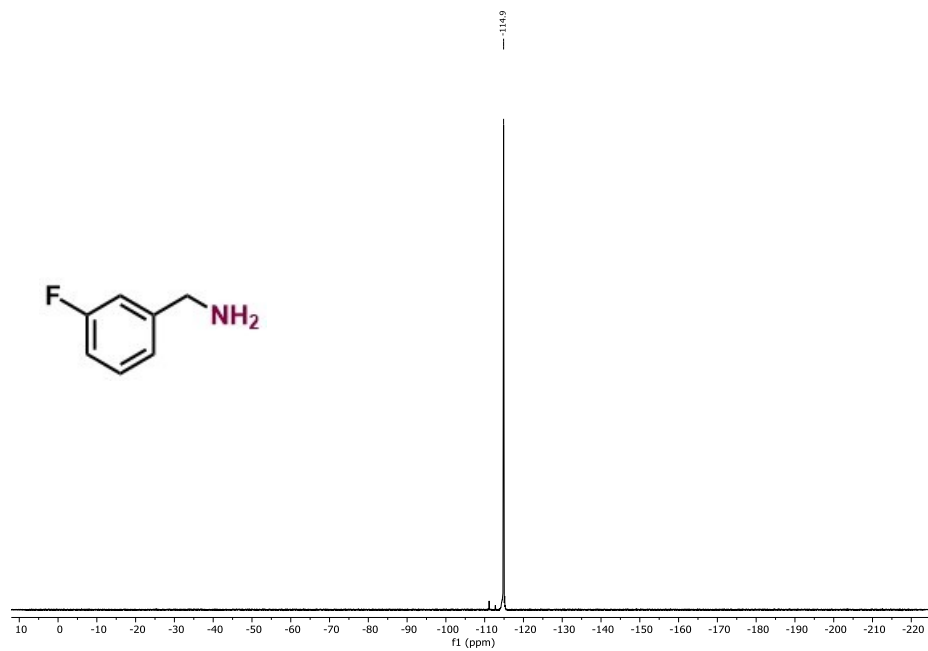

$^{19}\text{F}$  NMR (282 MHz,  $\text{CDCl}_3$ ) 3-Fluorobenzylamine (**3c**)

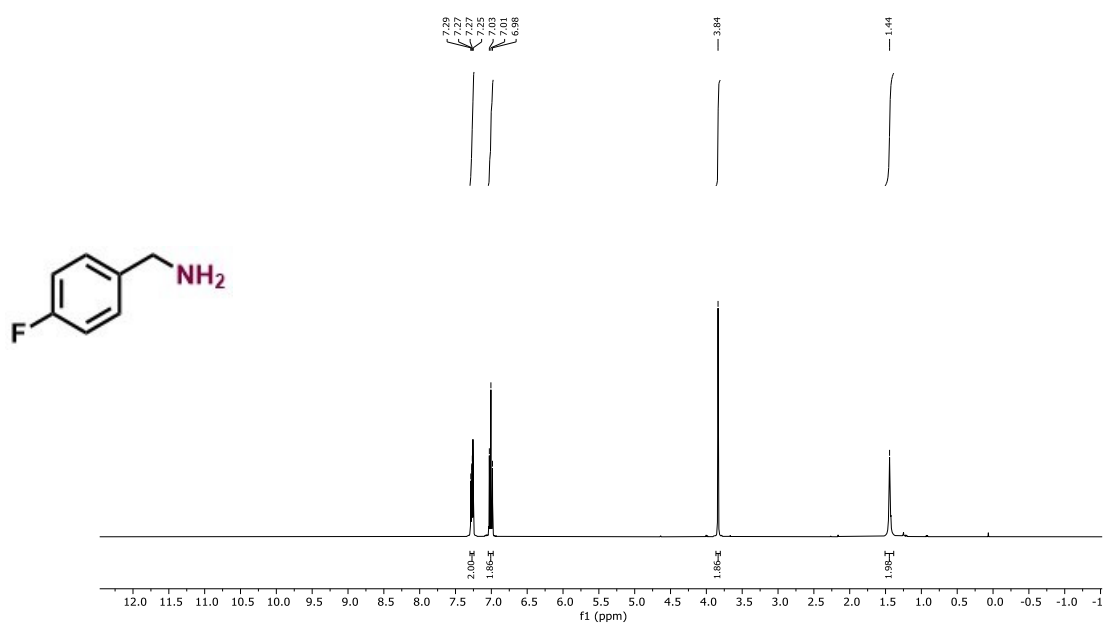

$^1\text{H}$  NMR (400 MHz,  $\text{CDCl}_3$ ) 4-Fluorobenzylamine (**3d**)

162.9  
160.5  
138.8  
128.6  
128.5  
115.3  
115.0  
45.7

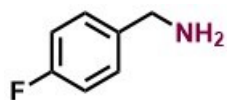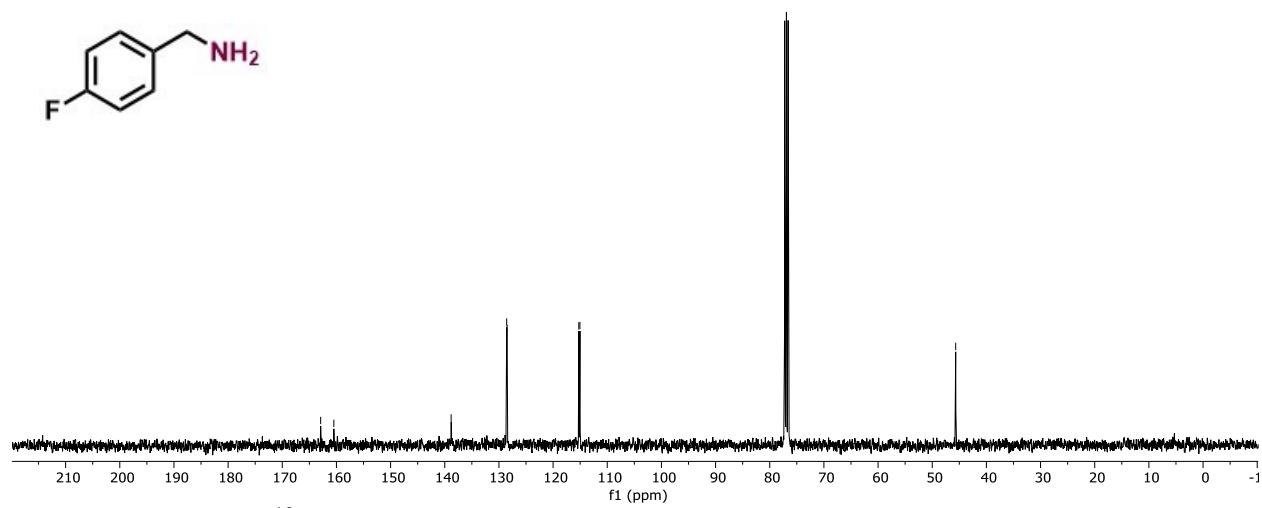

$^{13}\text{C}$  NMR (101 MHz,  $\text{CDCl}_3$ ) 4-Fluorobenzylamine (**3d**)

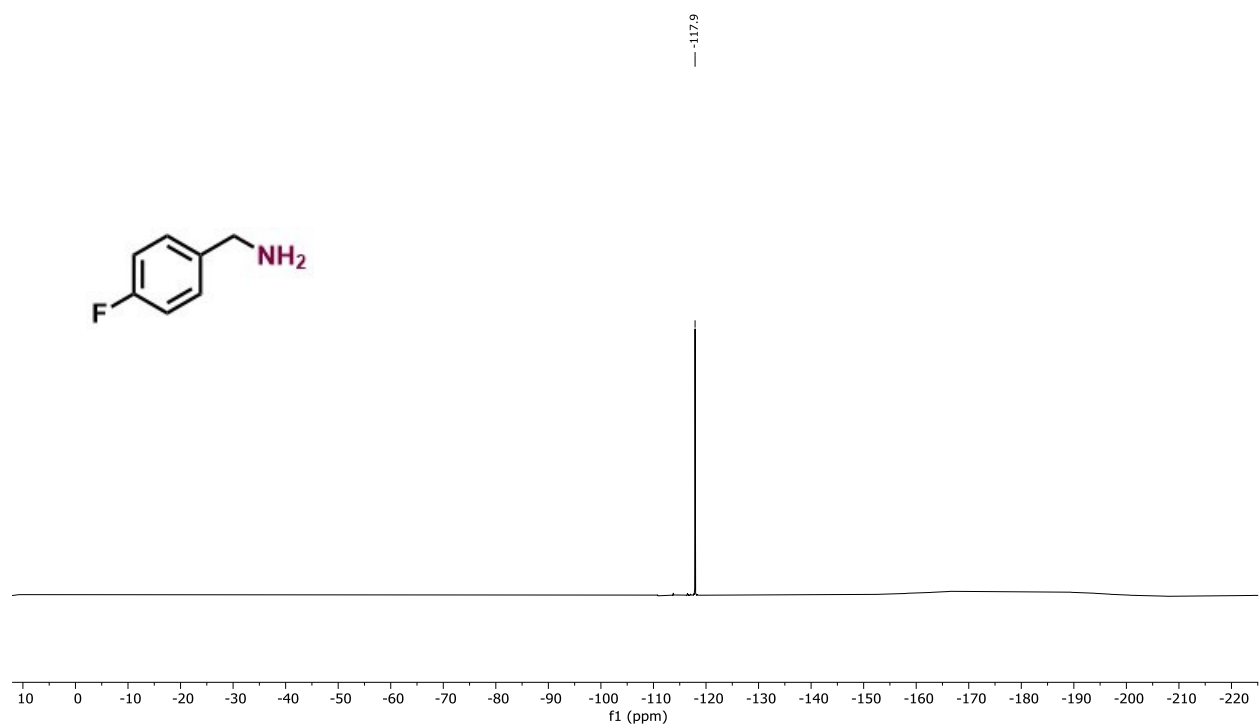

<sup>19</sup>F NMR (282 MHz, CDCl<sub>3</sub>) 4-Fluorobenzylamine (**3d**)

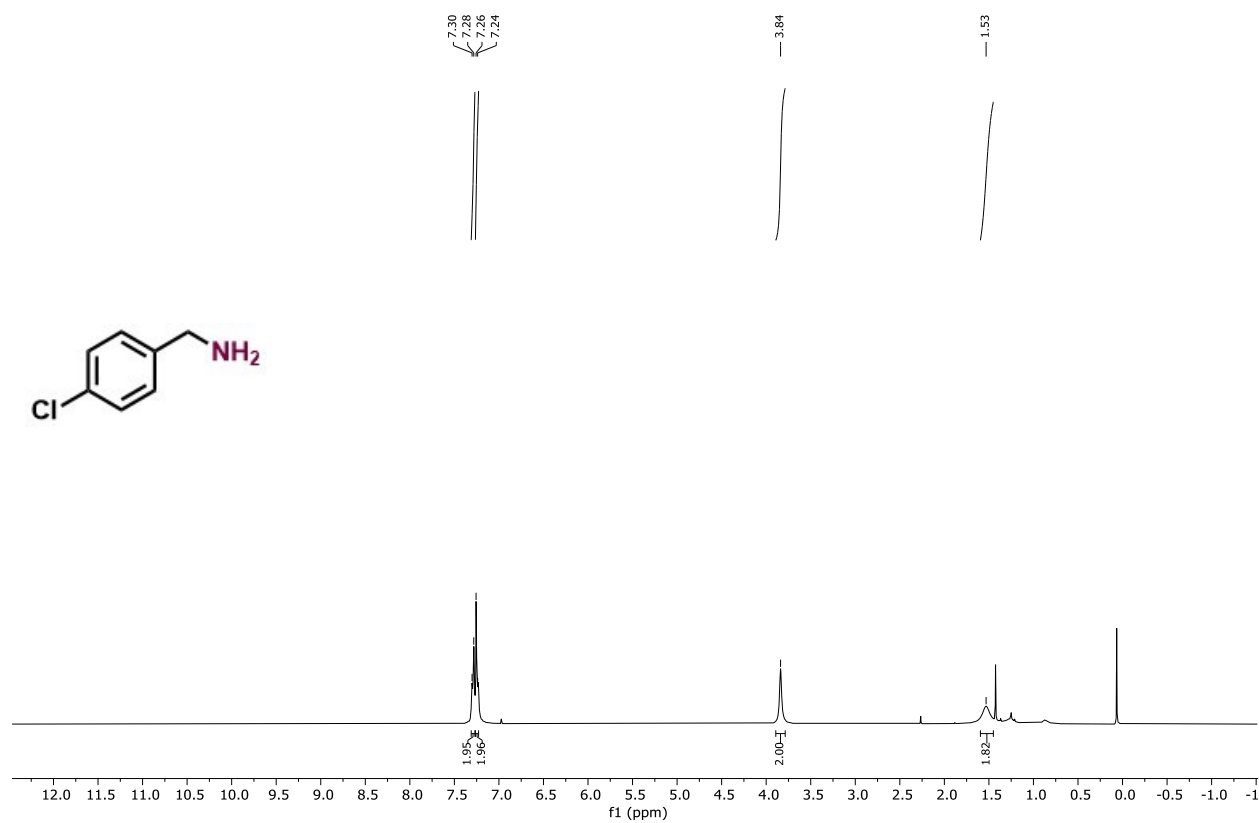

<sup>1</sup>H NMR (400 MHz, CDCl<sub>3</sub>) 4-Chlorobenzylamine (**3e**)

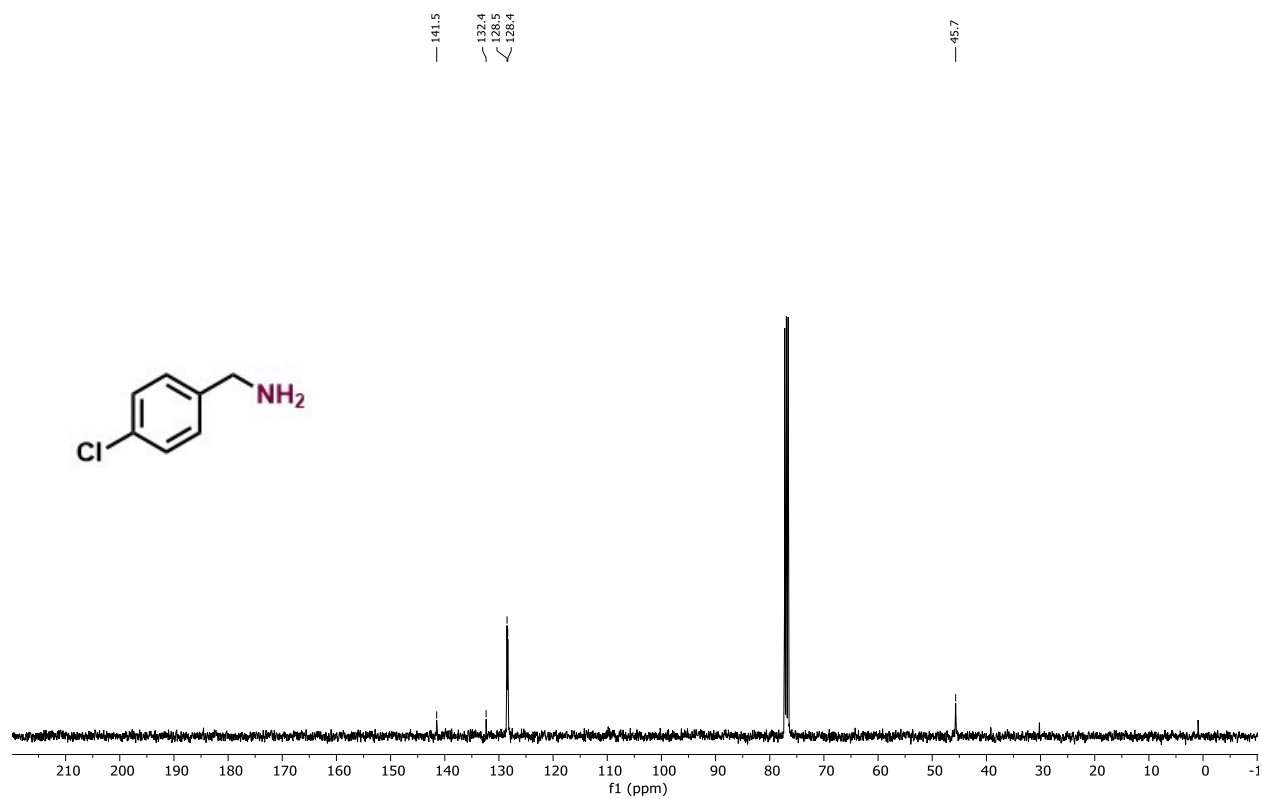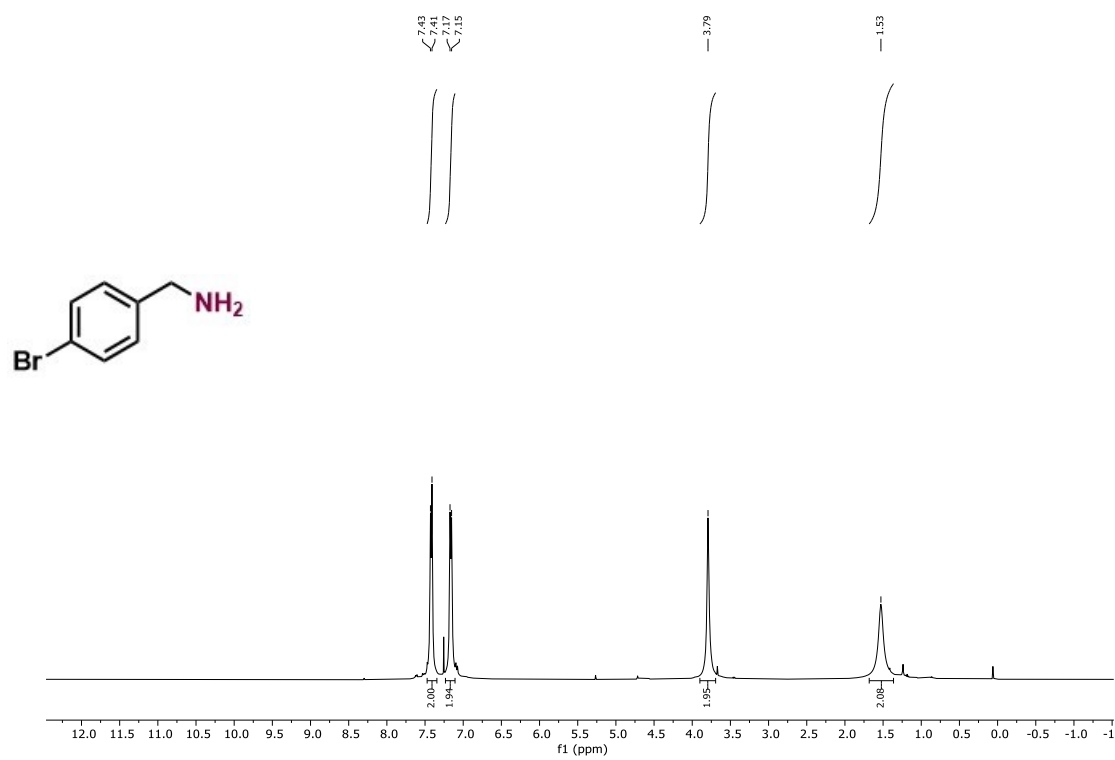



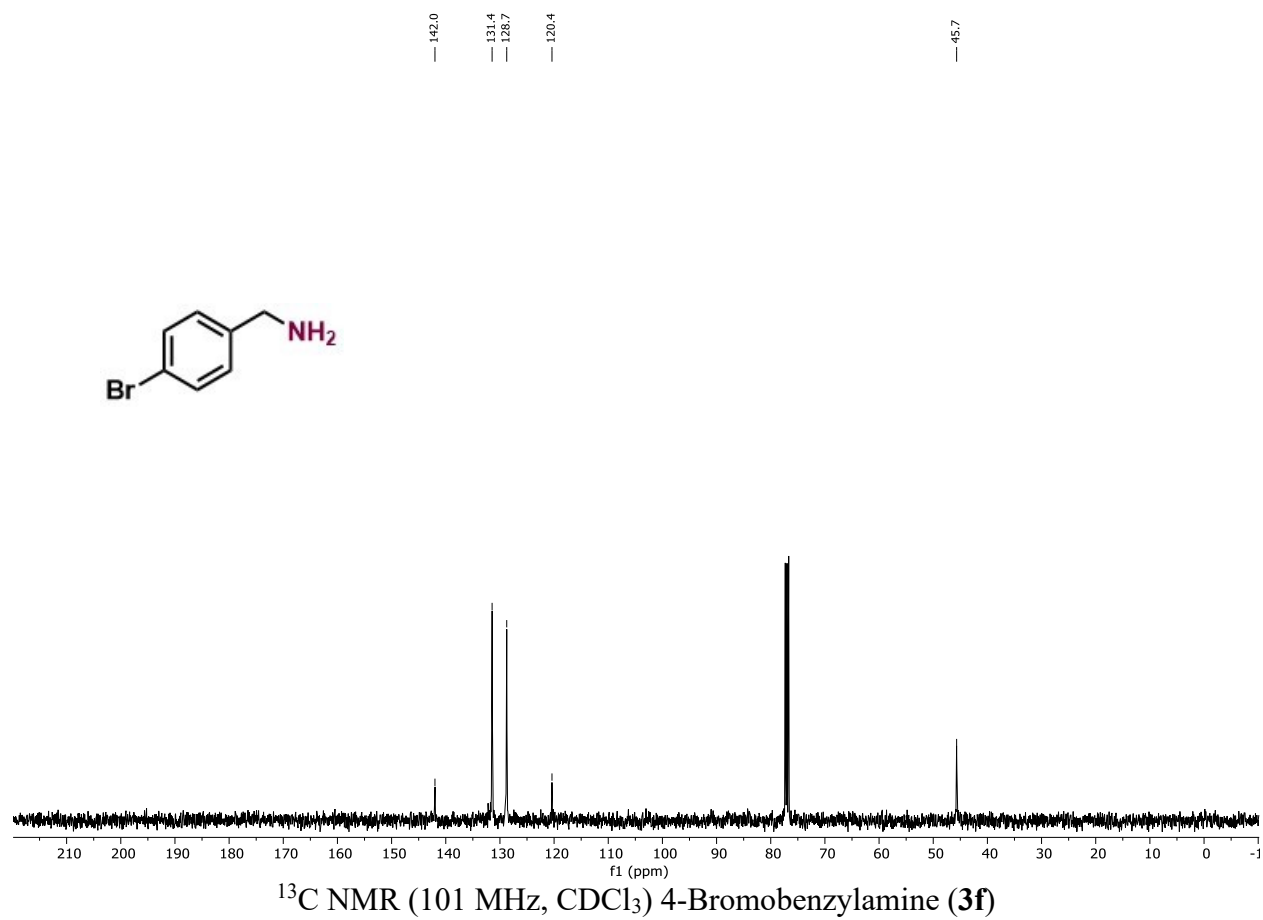

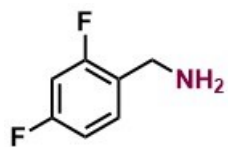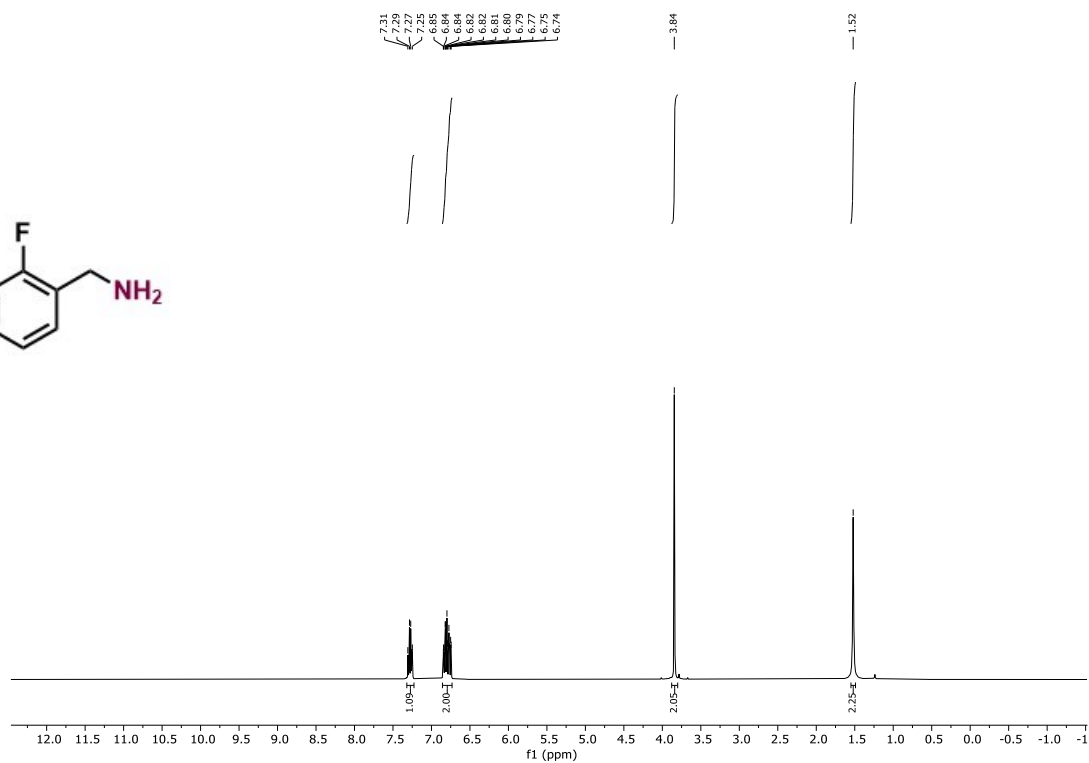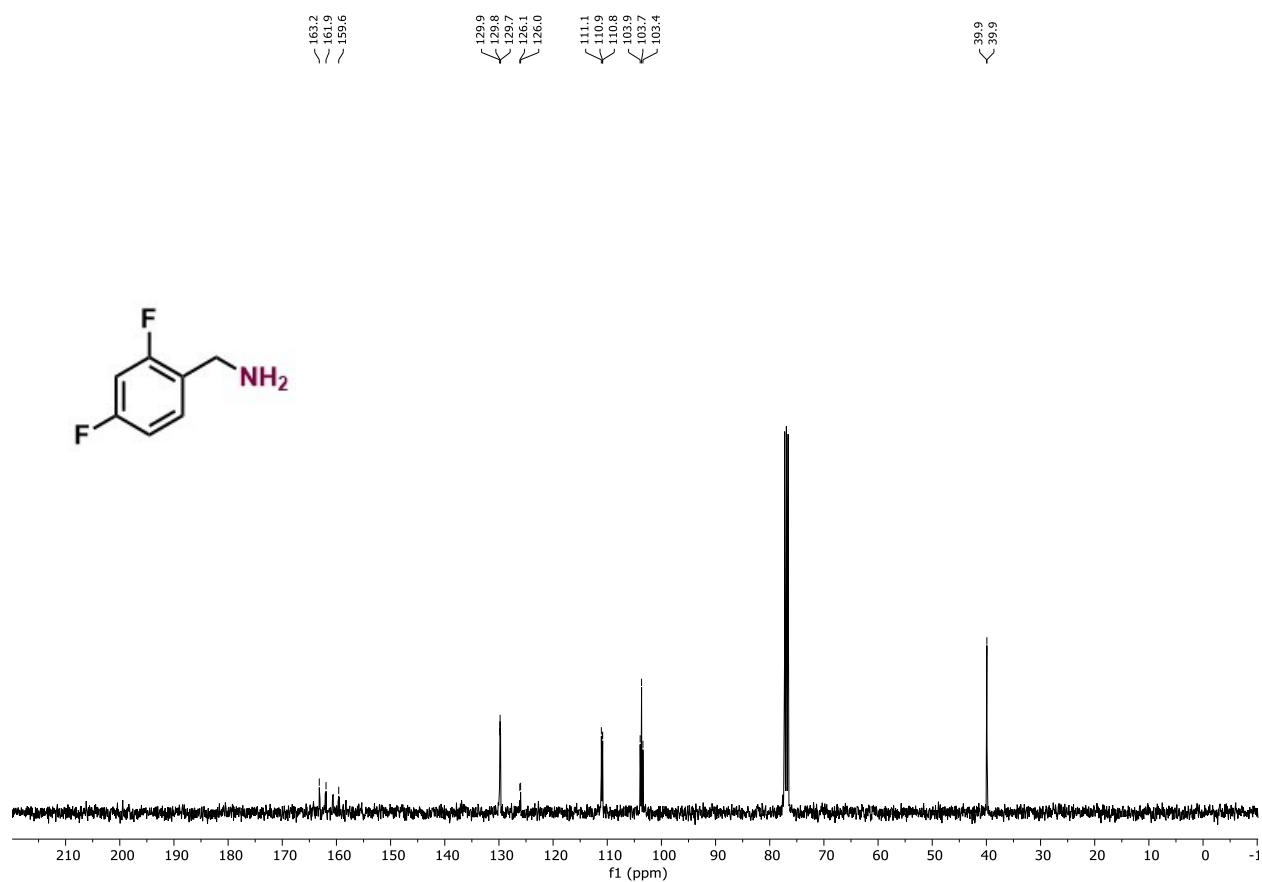

$^{13}\text{C}$  NMR (101 MHz,  $\text{CDCl}_3$ ) 2,4-Flourobenzylamine (**3g**)

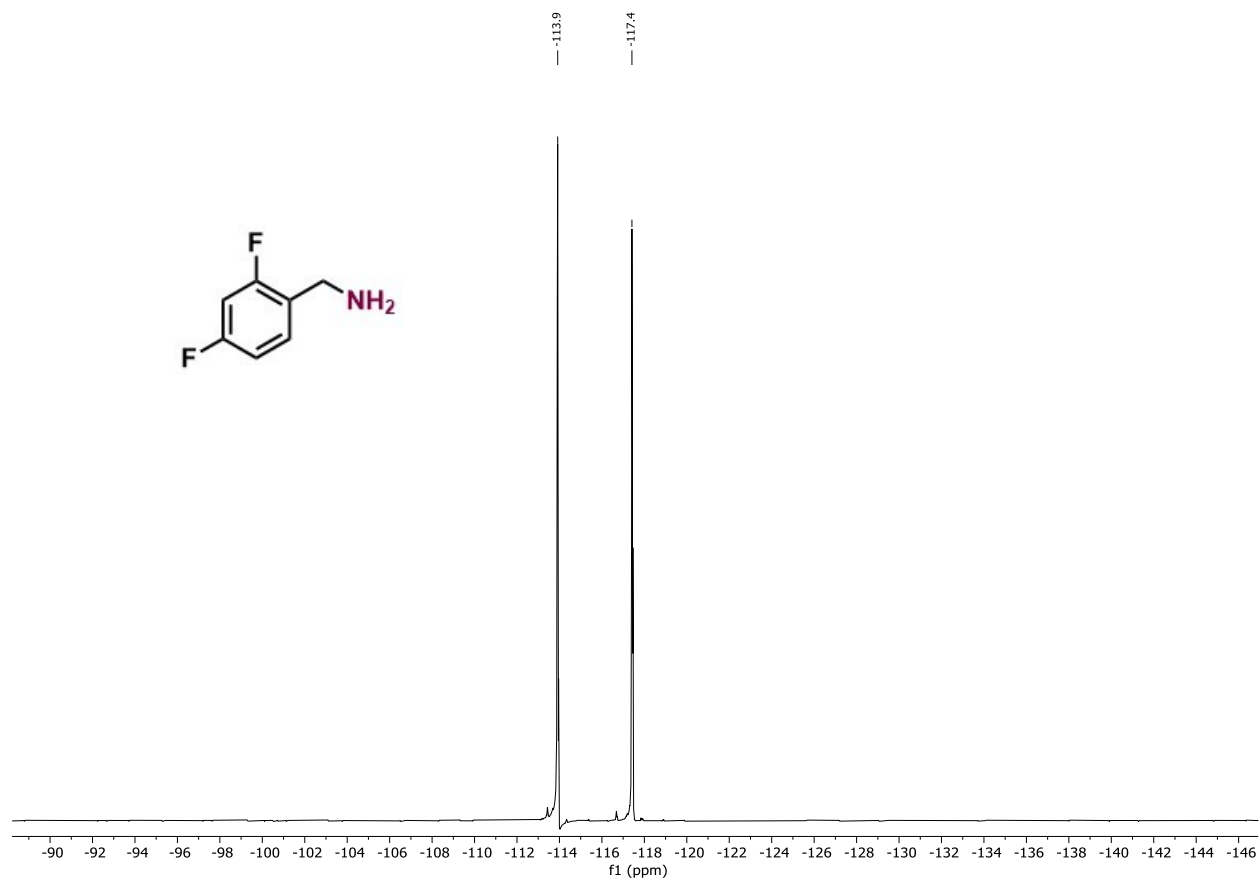

$^{19}\text{F}$  NMR (282 MHz,  $\text{CDCl}_3$ ) 2,4-Fluorobenzylamine (**3g**)

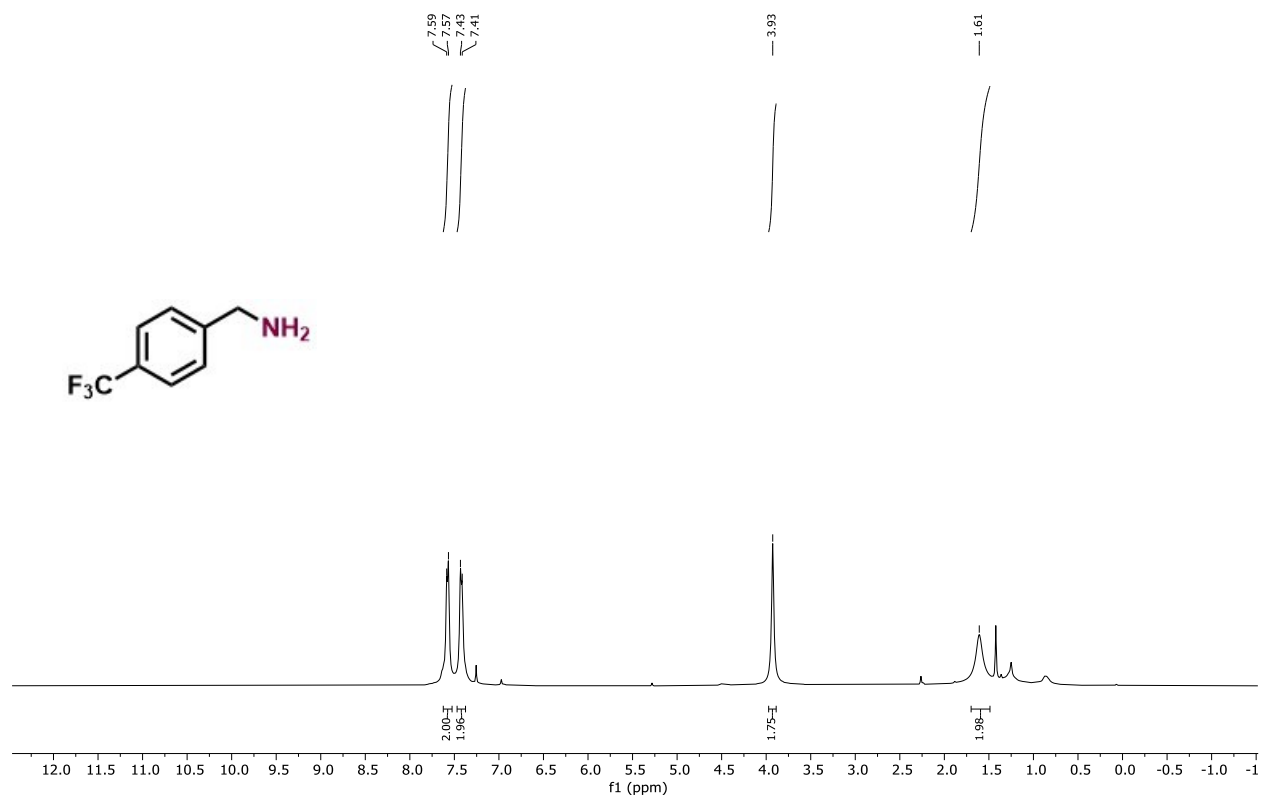

<sup>1</sup>H NMR (400 MHz, CDCl<sub>3</sub>) (4-(Trifluoromethyl)phenyl)methanamine (**3h**)

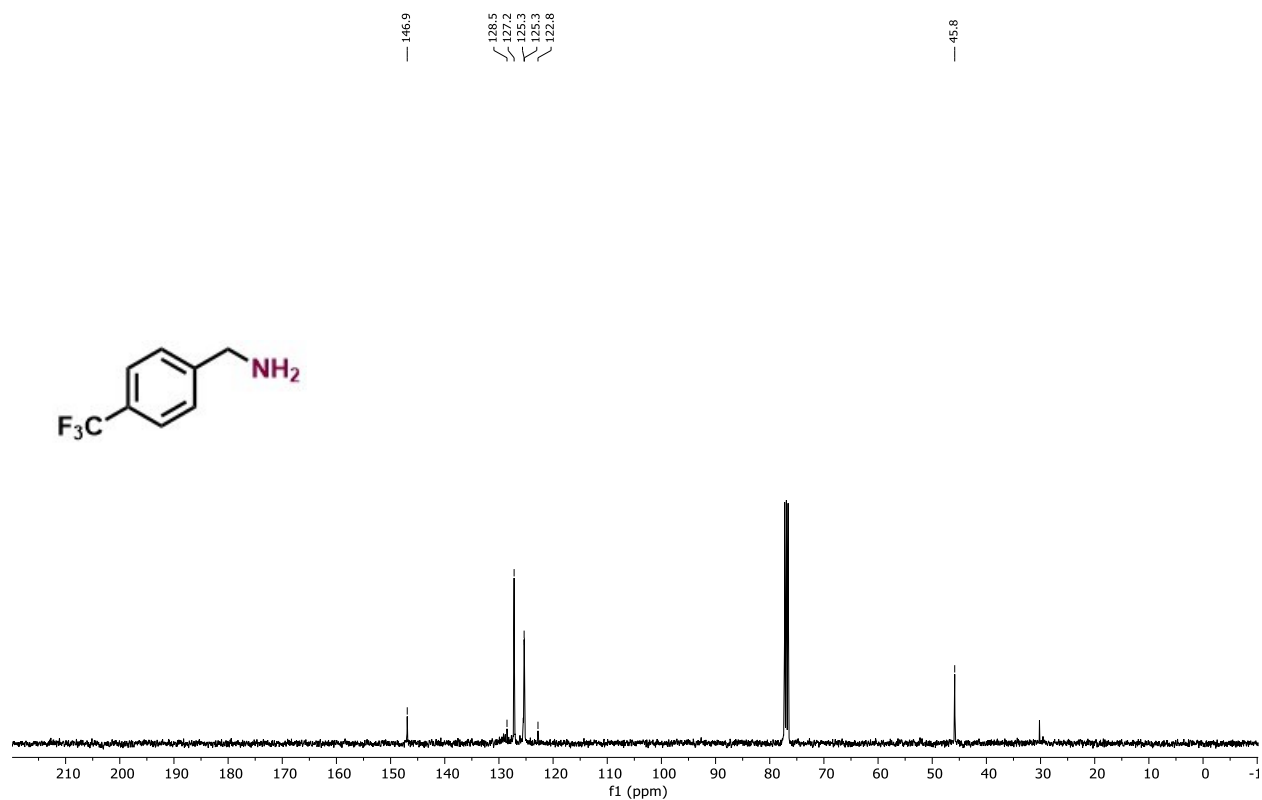

<sup>13</sup>C NMR (101 MHz, CDCl<sub>3</sub>) (4-(Trifluoromethyl)phenyl)methanamine (**3h**)

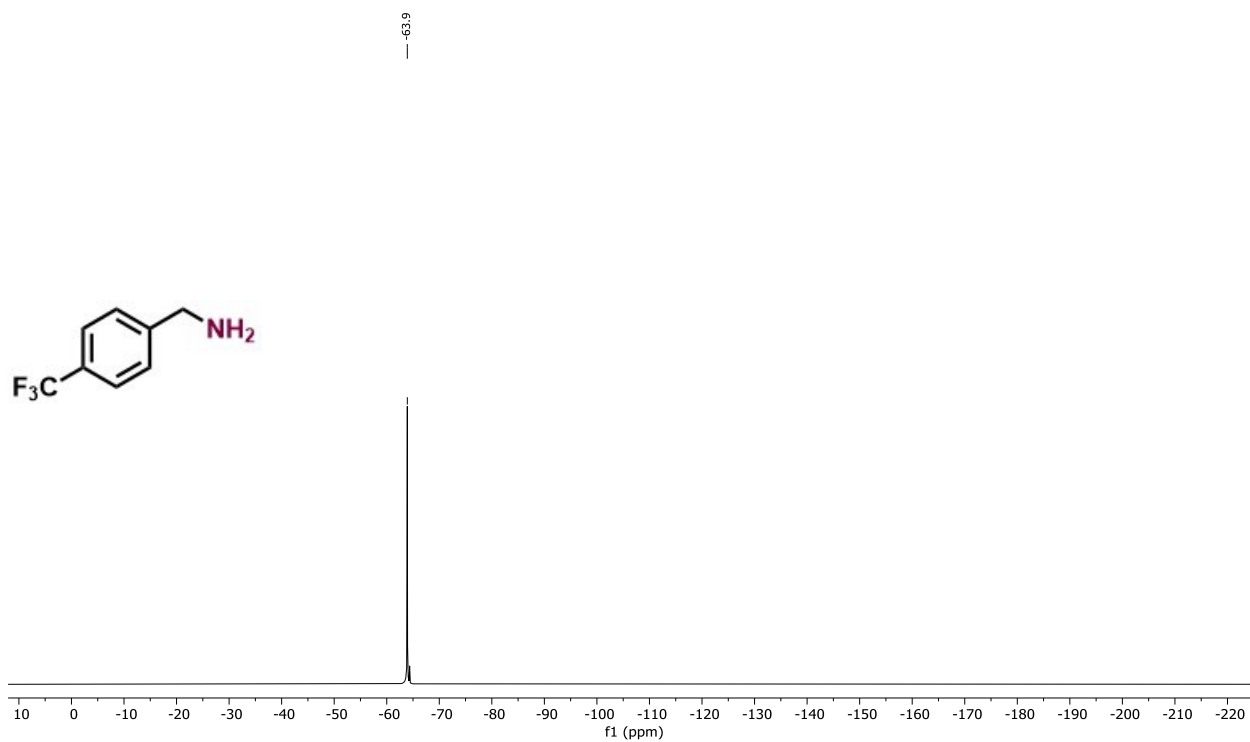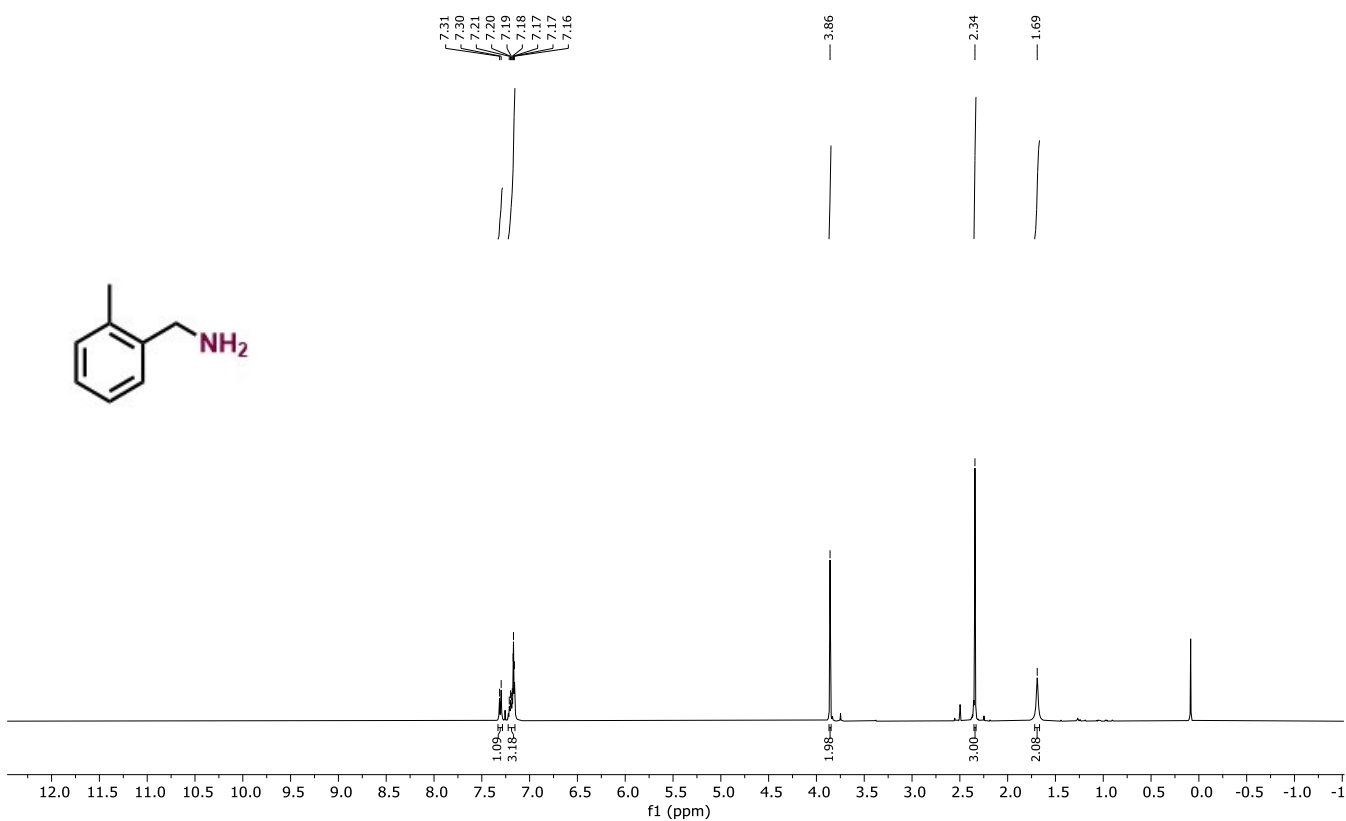

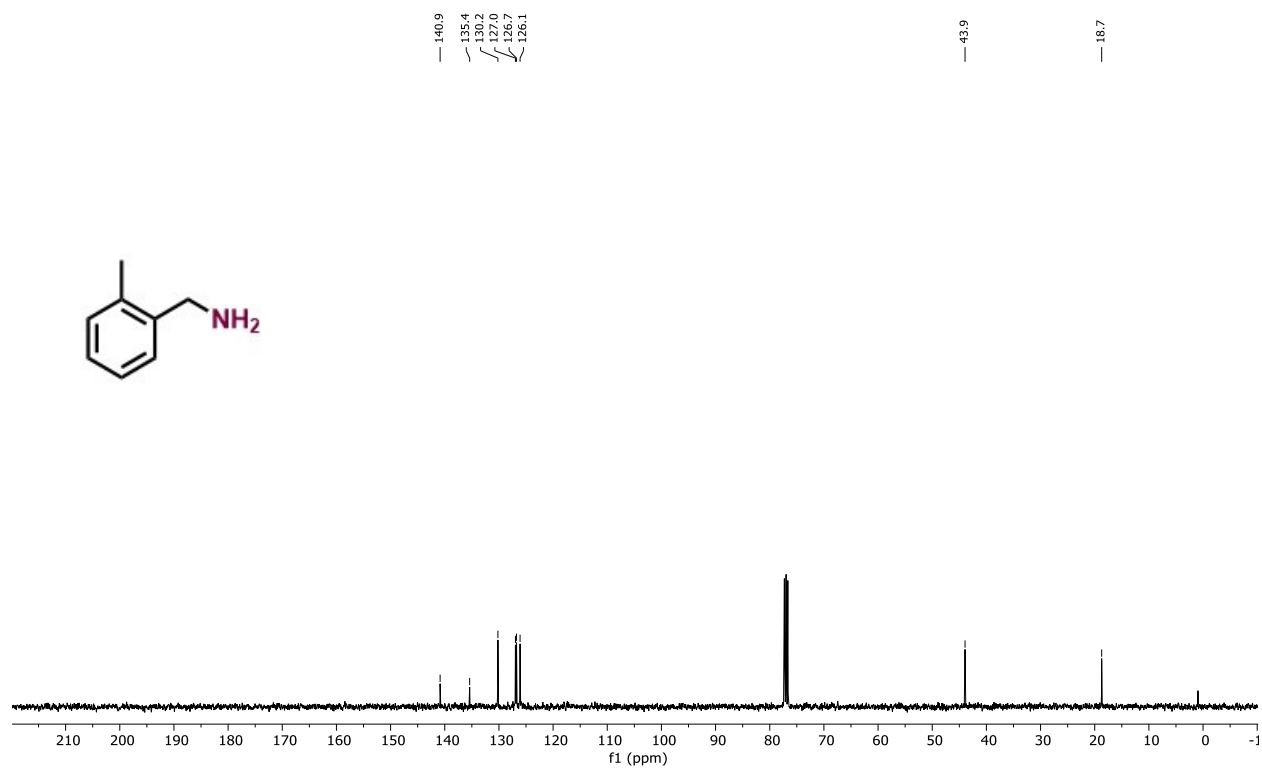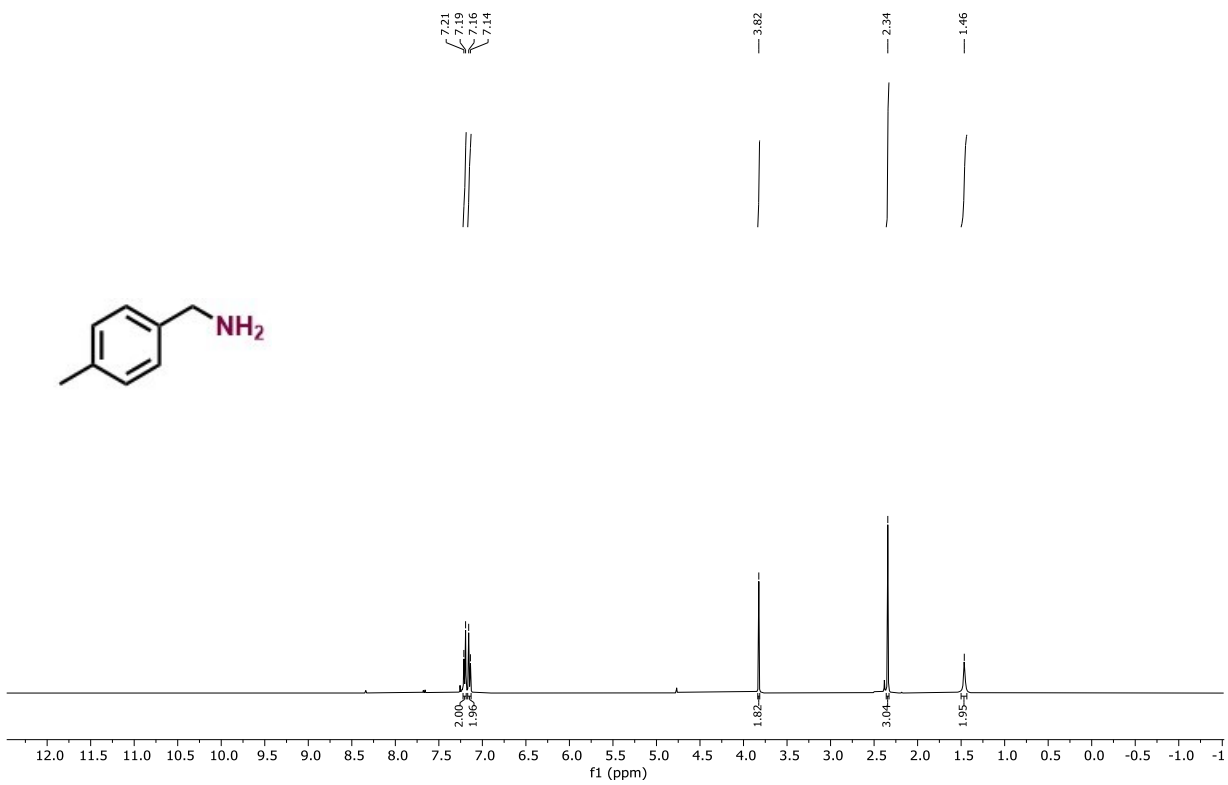

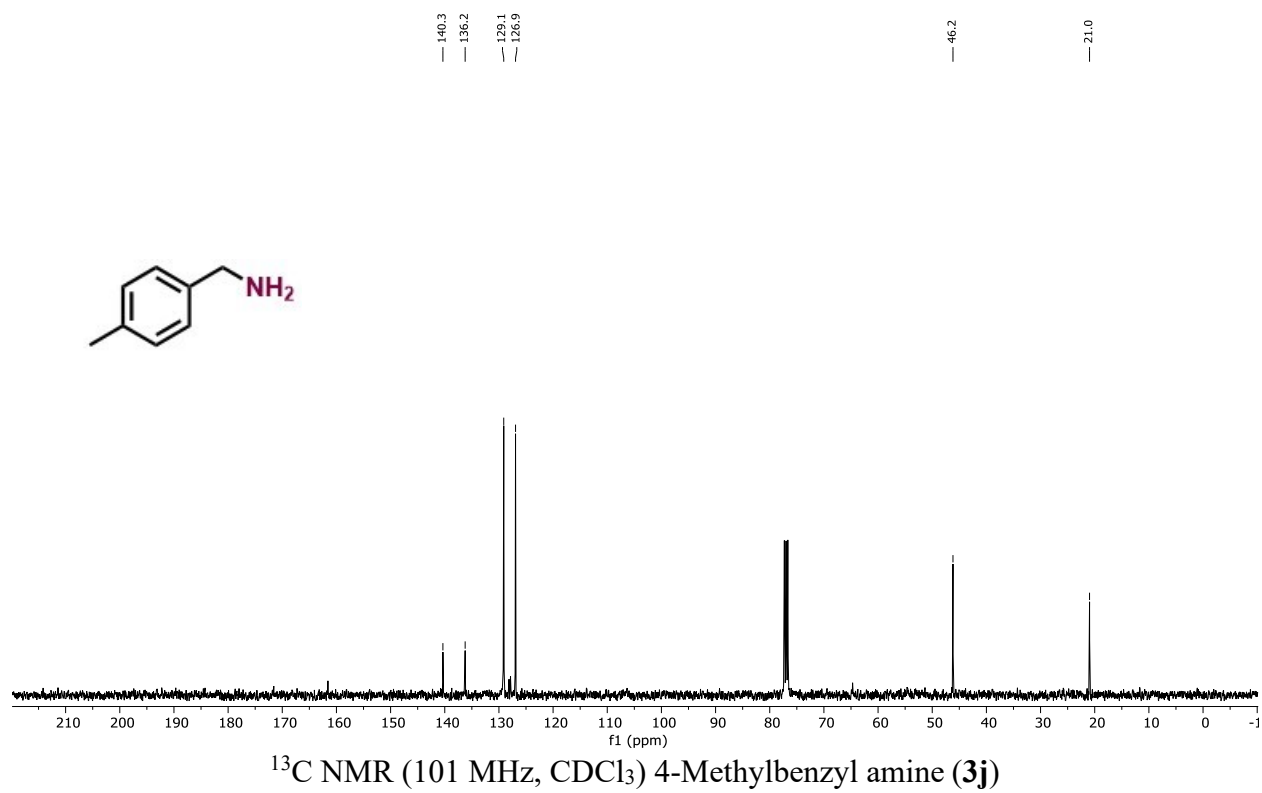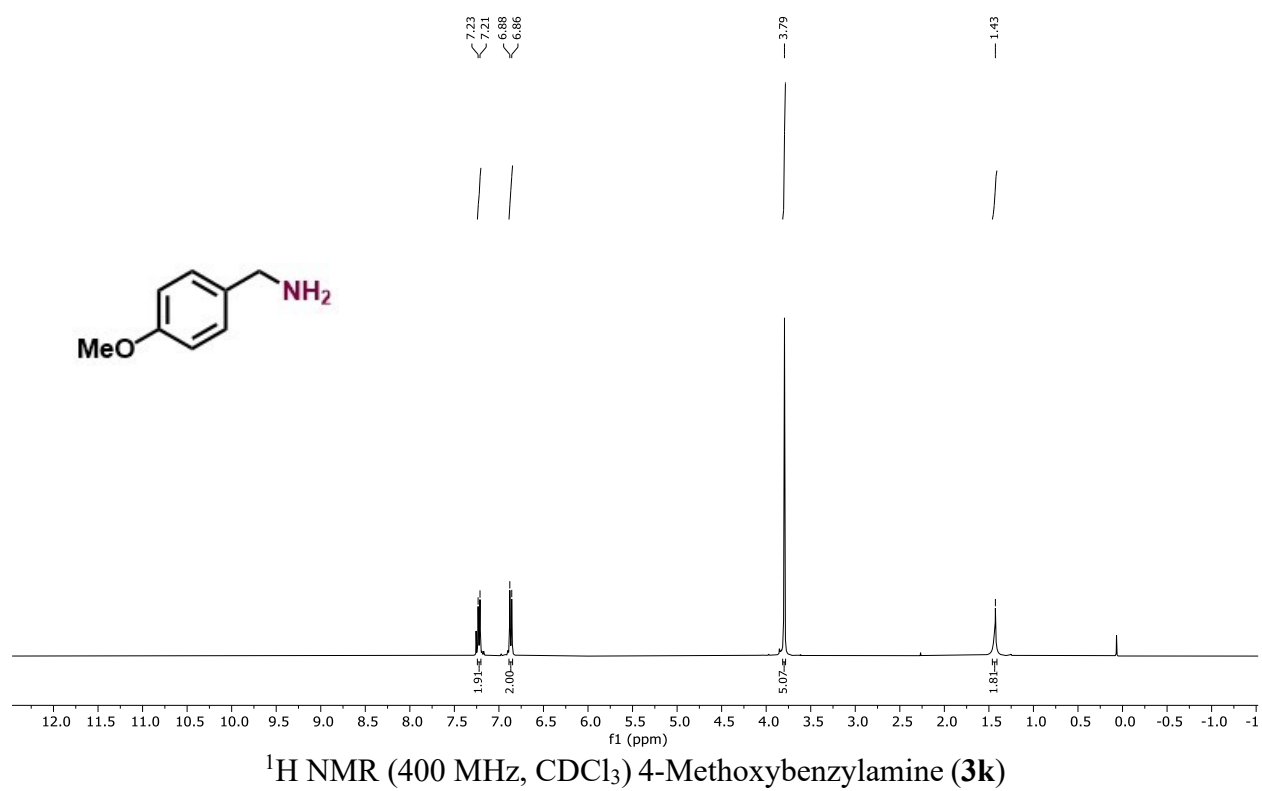

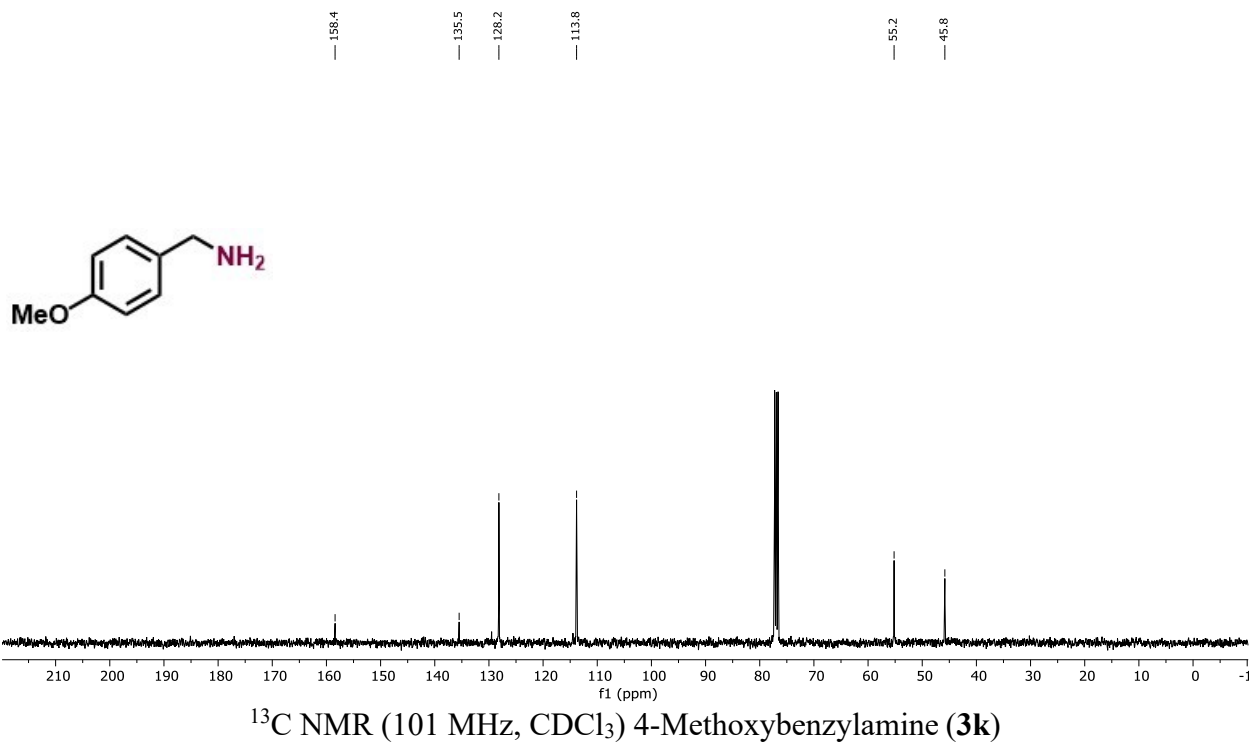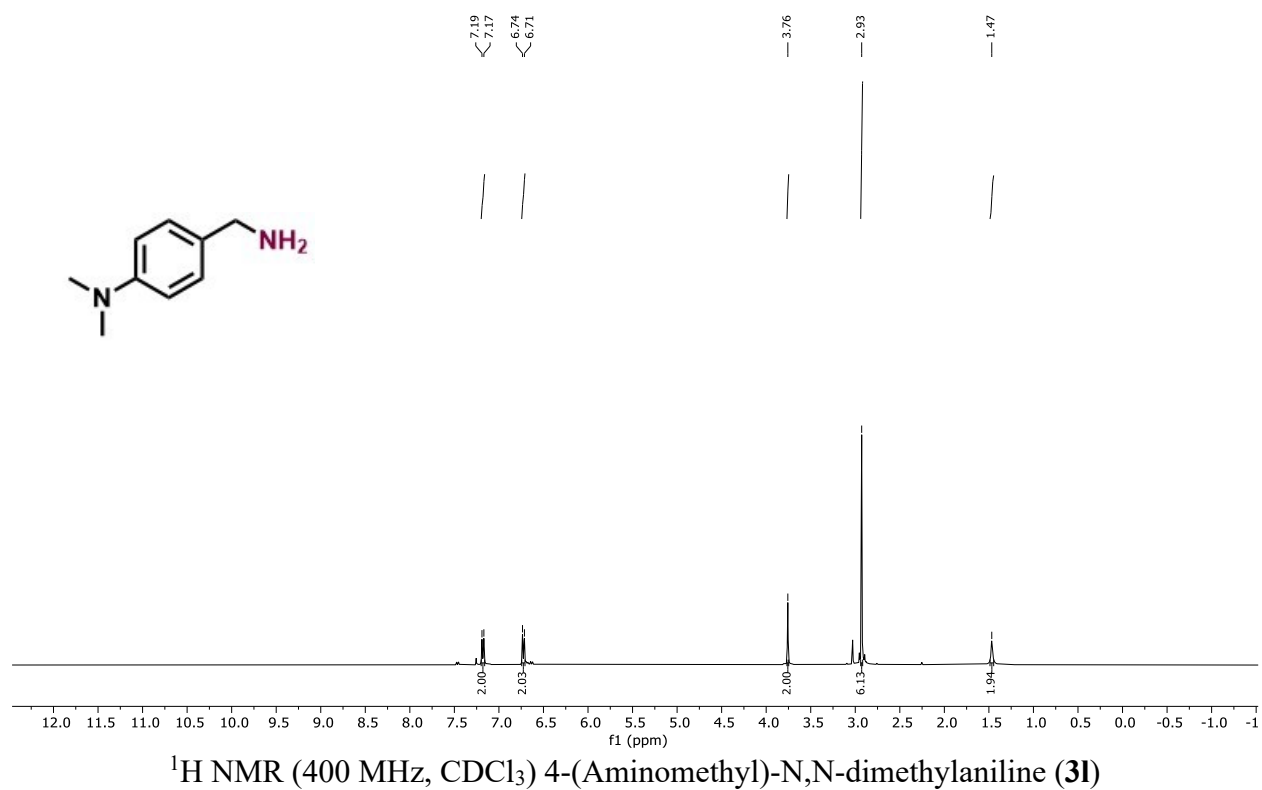



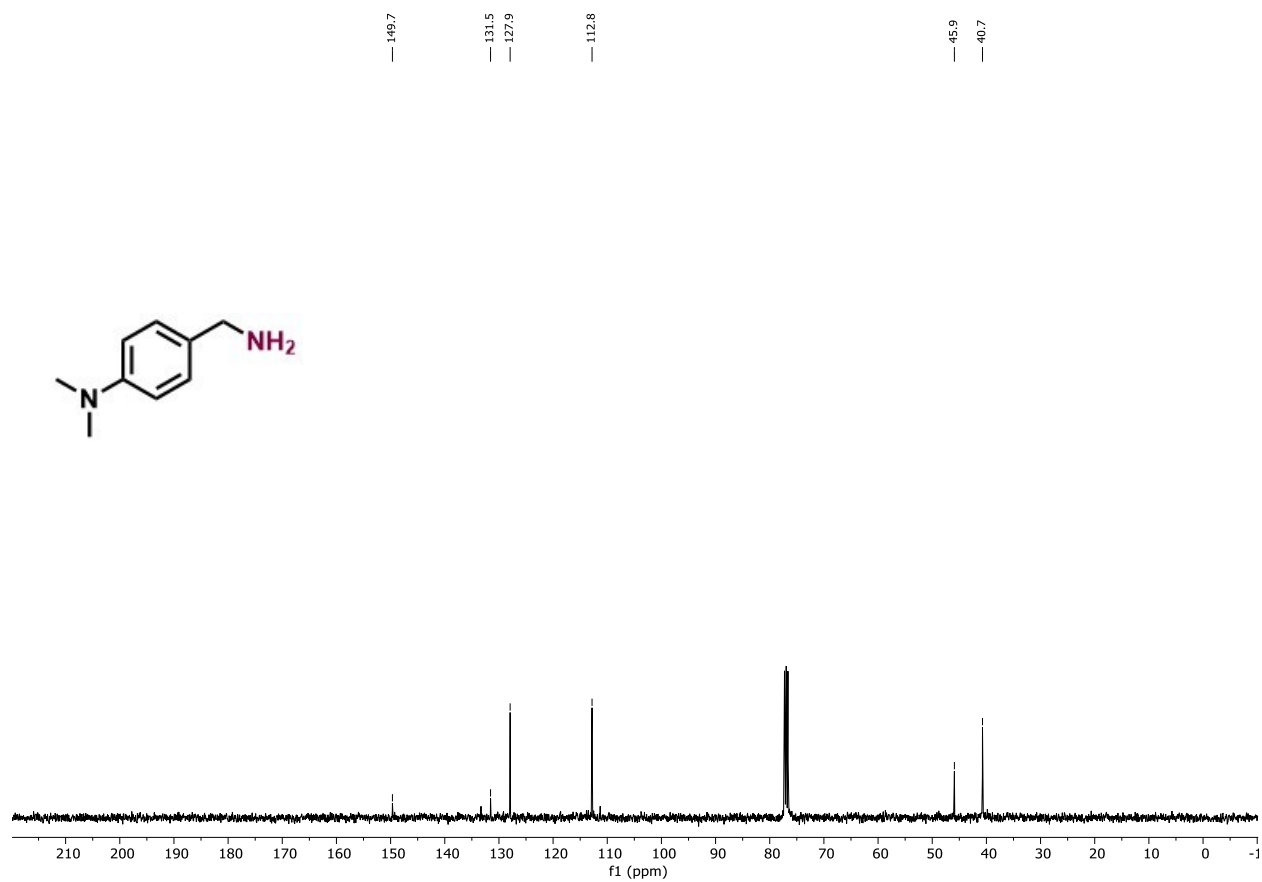

<sup>13</sup>C NMR (101 MHz, CDCl<sub>3</sub>) 4-(Aminomethyl)-N,N-dimethylaniline (**3I**)

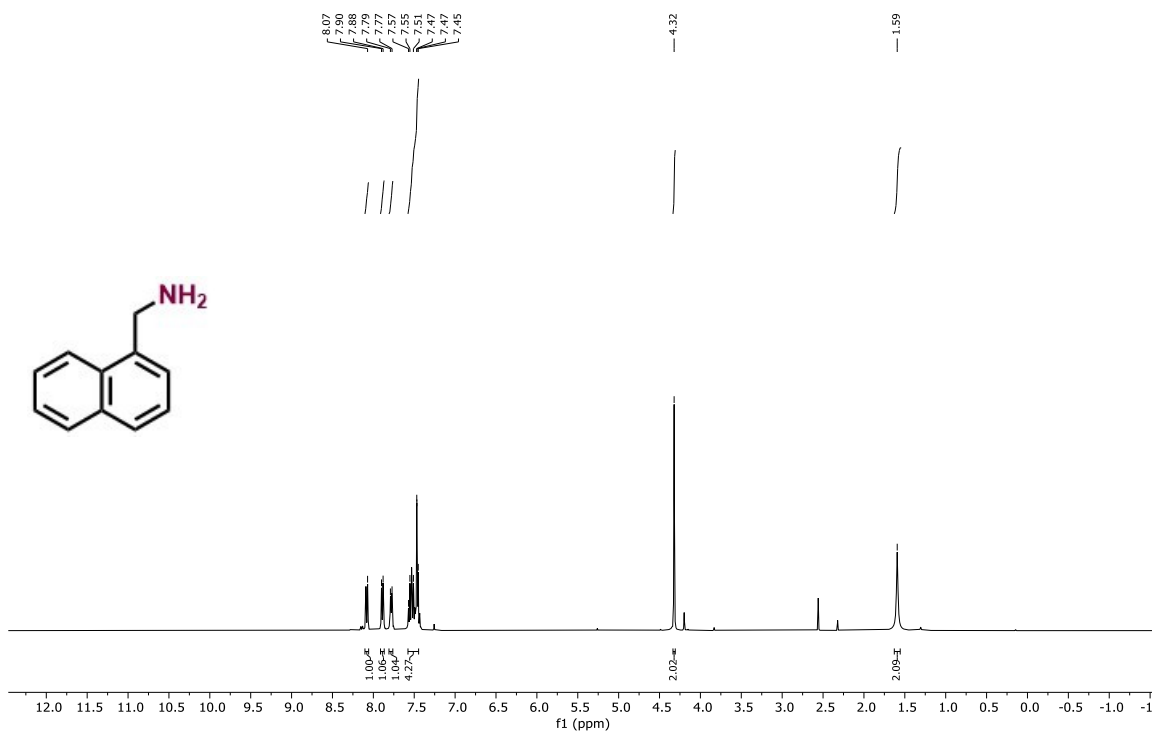

$^1\text{H}$  NMR (400 MHz,  $\text{CDCl}_3$ ) Naphthalen-1-ylmethanamine (**3m**)

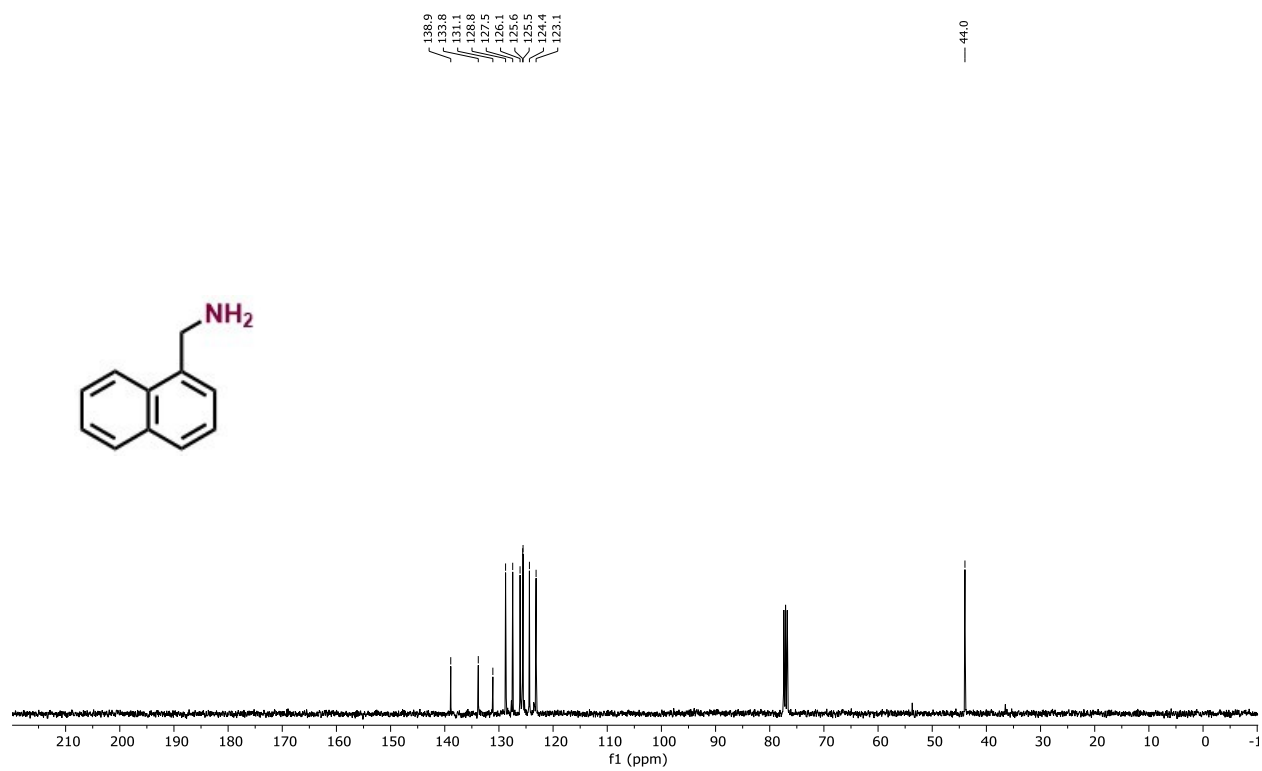

$^{13}\text{C}$  NMR (101 MHz,  $\text{CDCl}_3$ ) Naphthalen-1-ylmethanamine (**3m**)

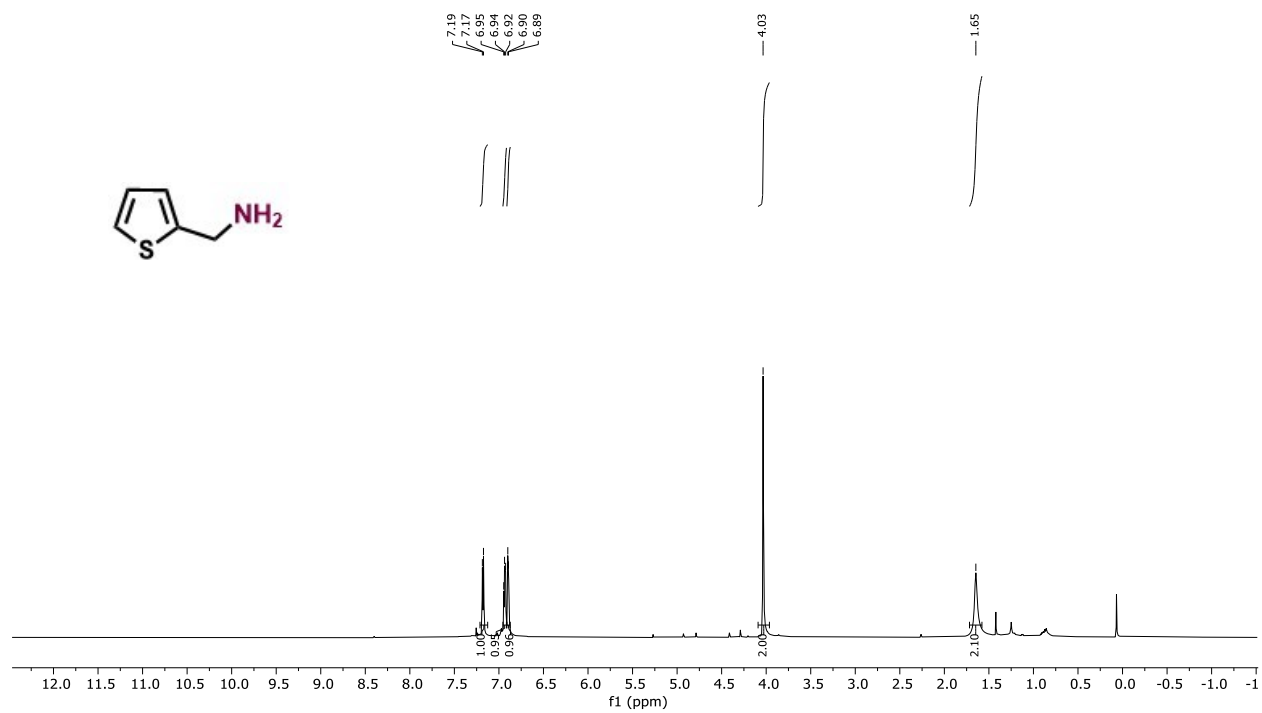

$^1\text{H}$  NMR (400 MHz,  $\text{CDCl}_3$ ) Thiophen-2-ylmethanamine (**3n**)

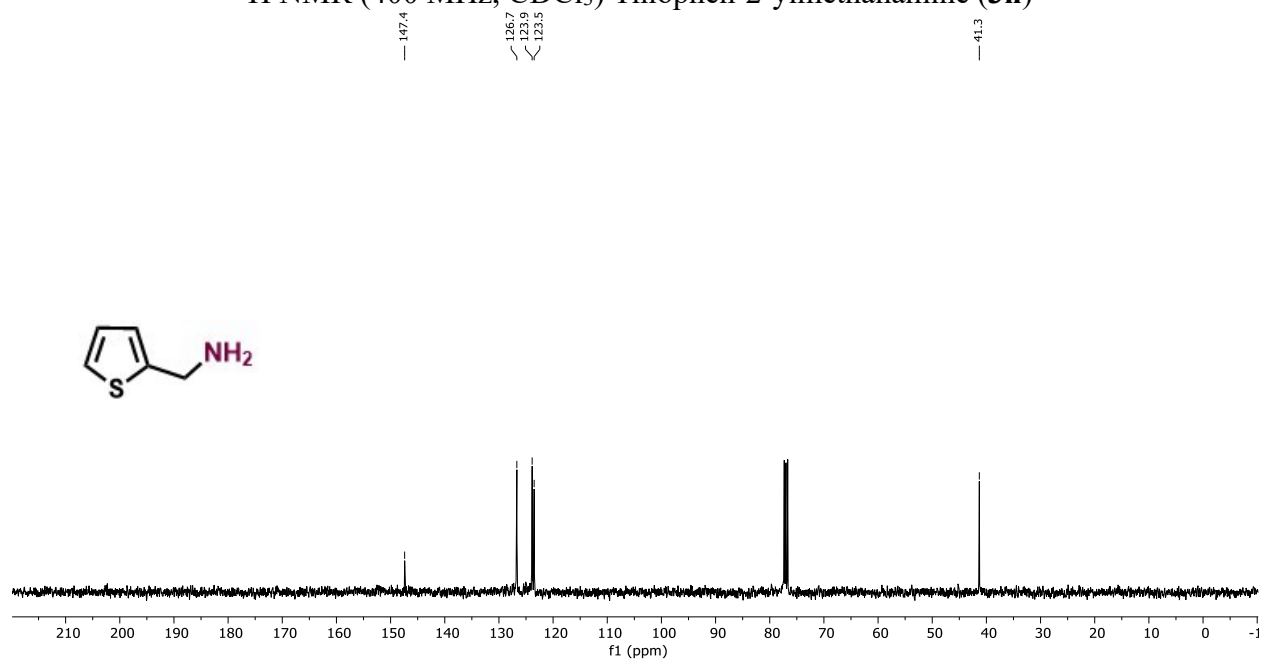

$^{13}\text{C}$  NMR (101 MHz,  $\text{CDCl}_3$ ) Thiophen-2-ylmethanamine (**3n**)

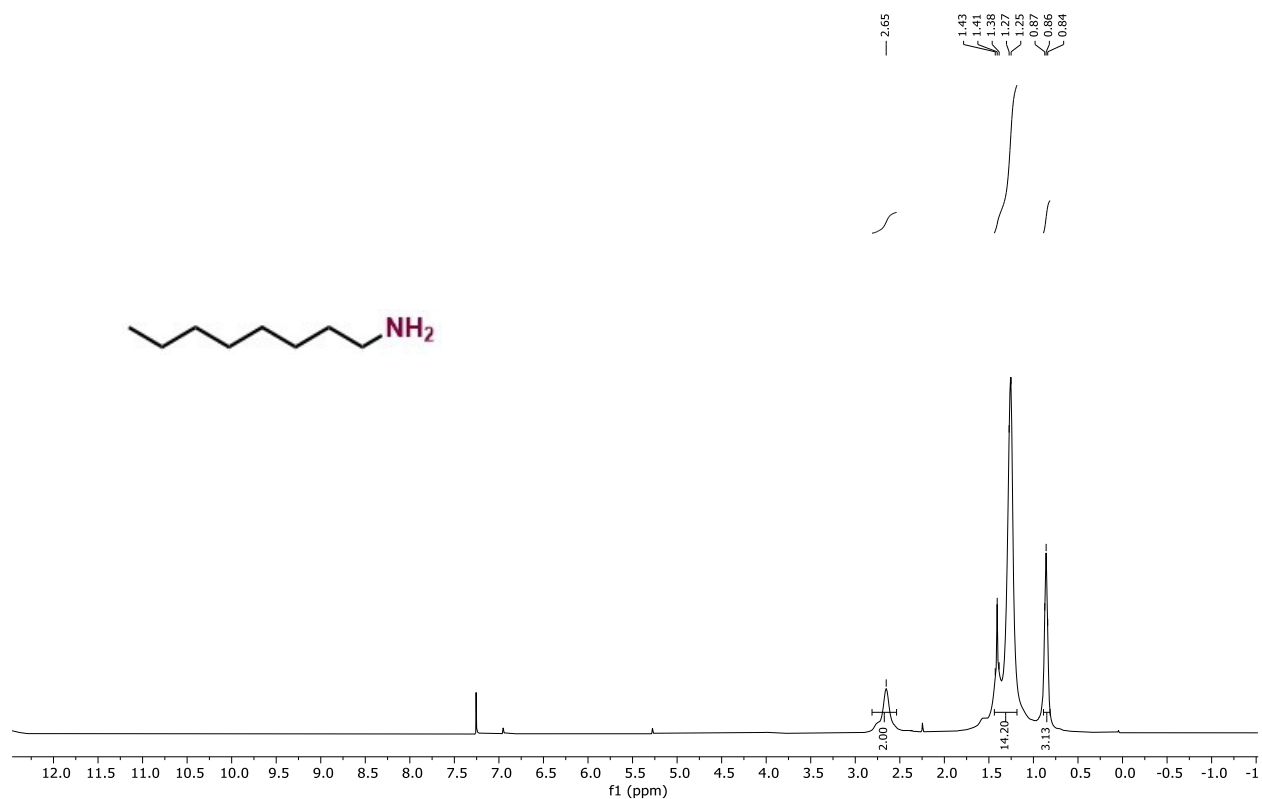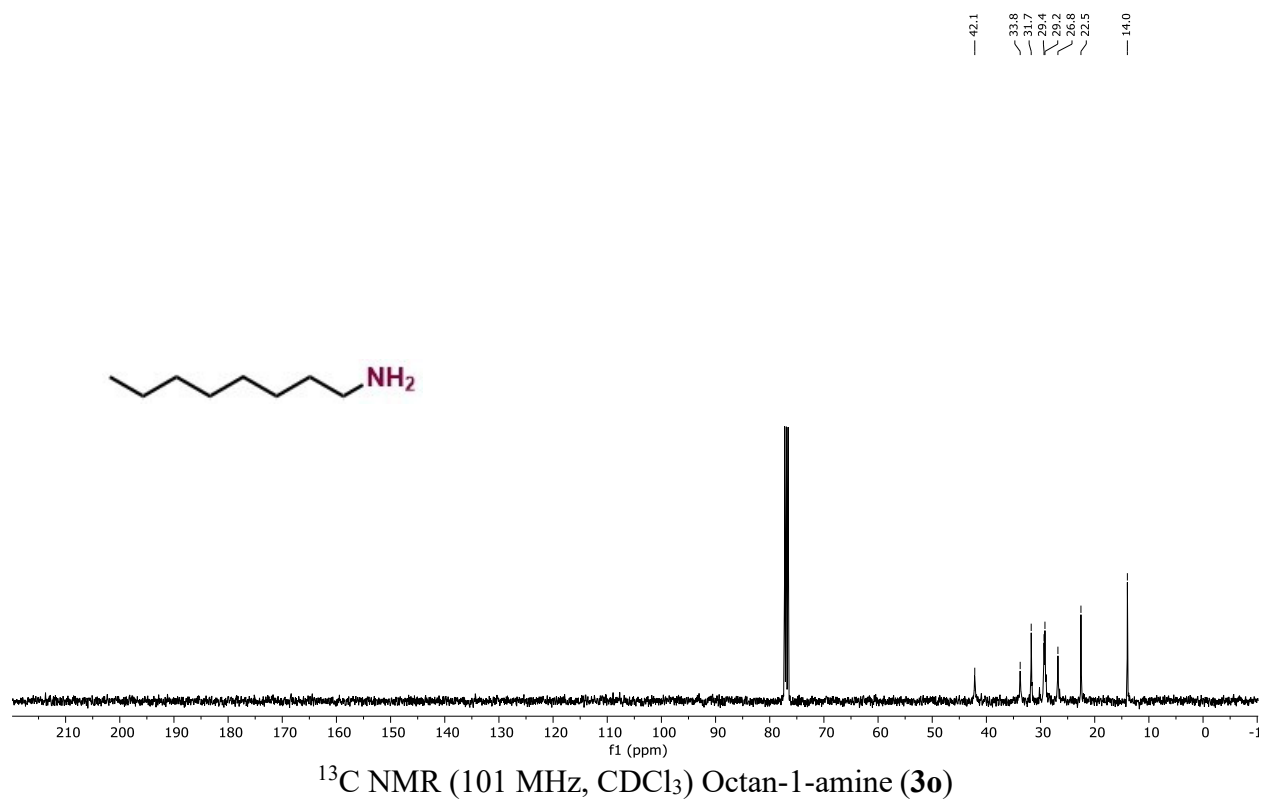

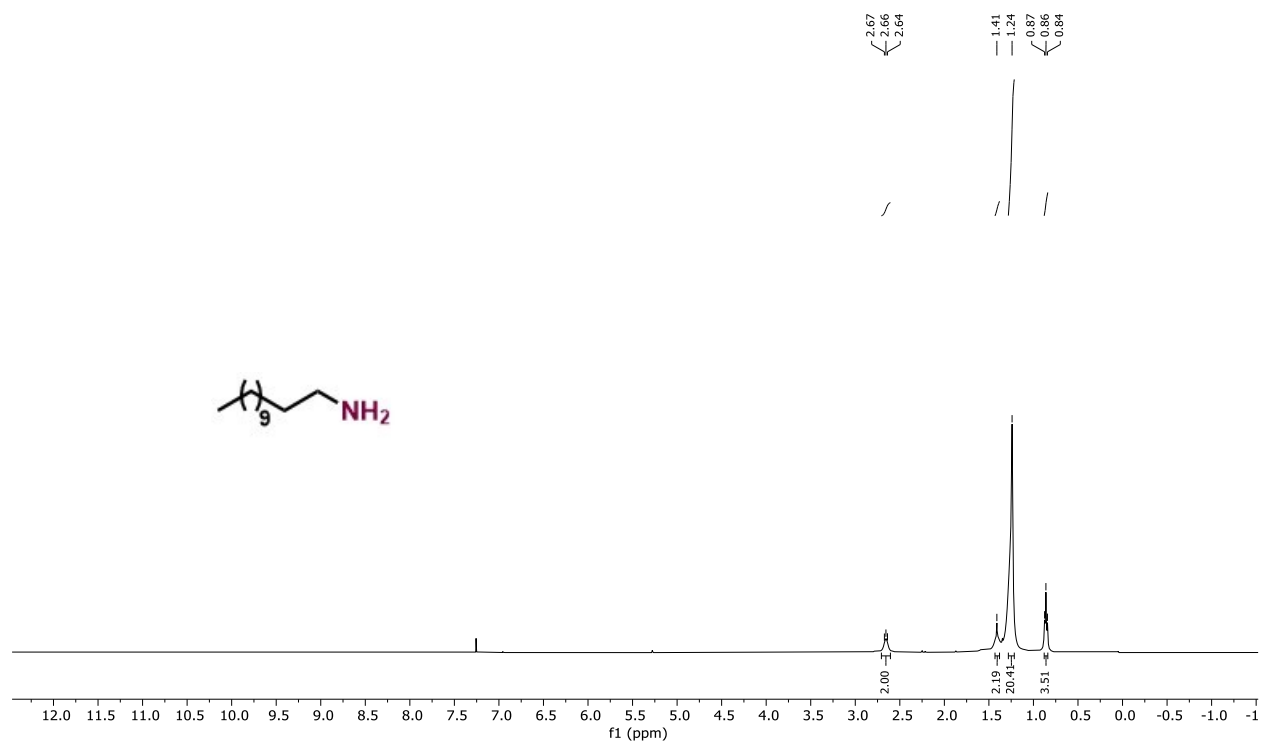

$^1\text{H}$  NMR (400 MHz,  $\text{CDCl}_3$ ) Dodecan-1-amine (**3p**)

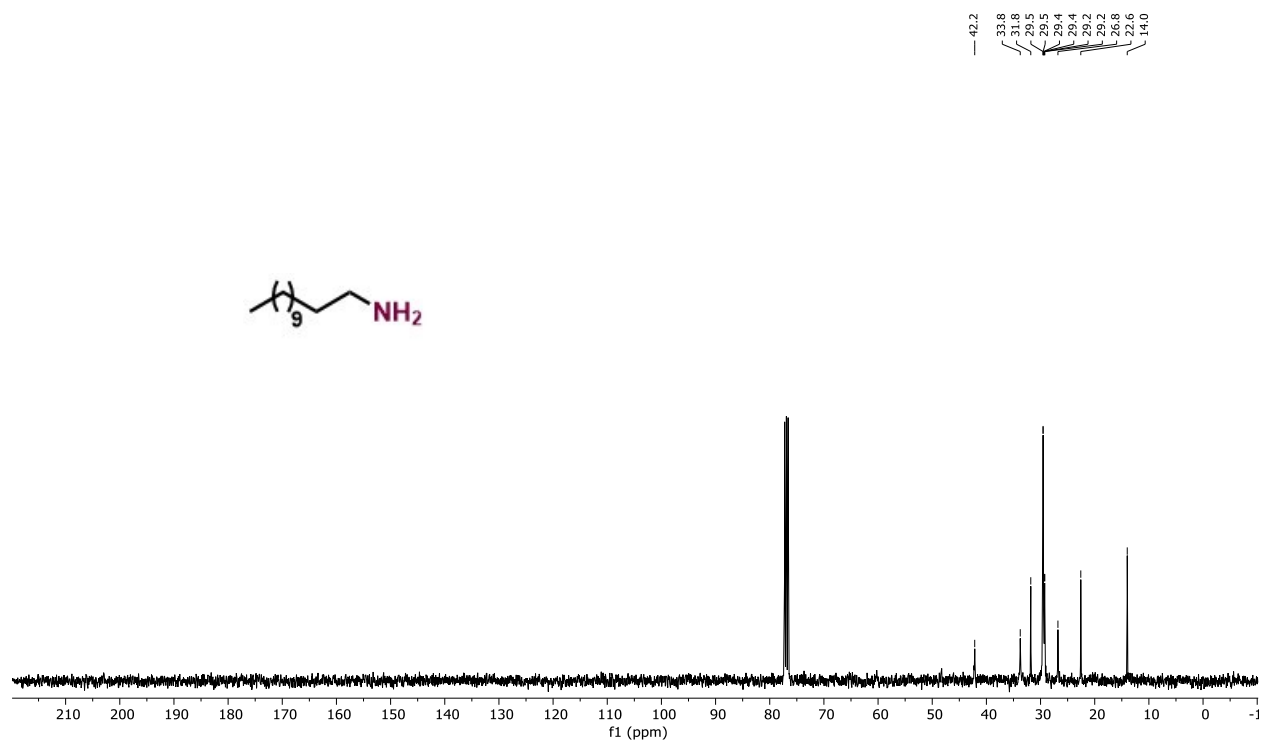

$^{13}\text{C}$  NMR (101 MHz,  $\text{CDCl}_3$ ) Dodecan-1-amine (**3p**)

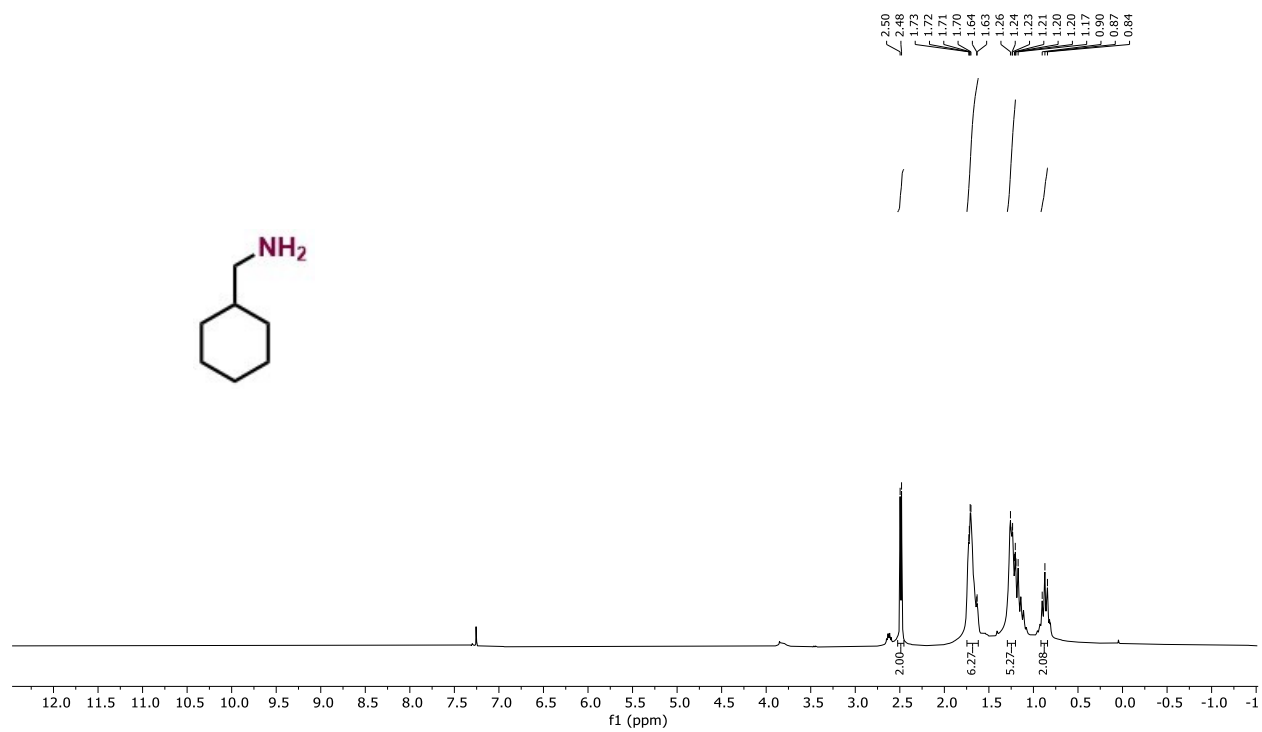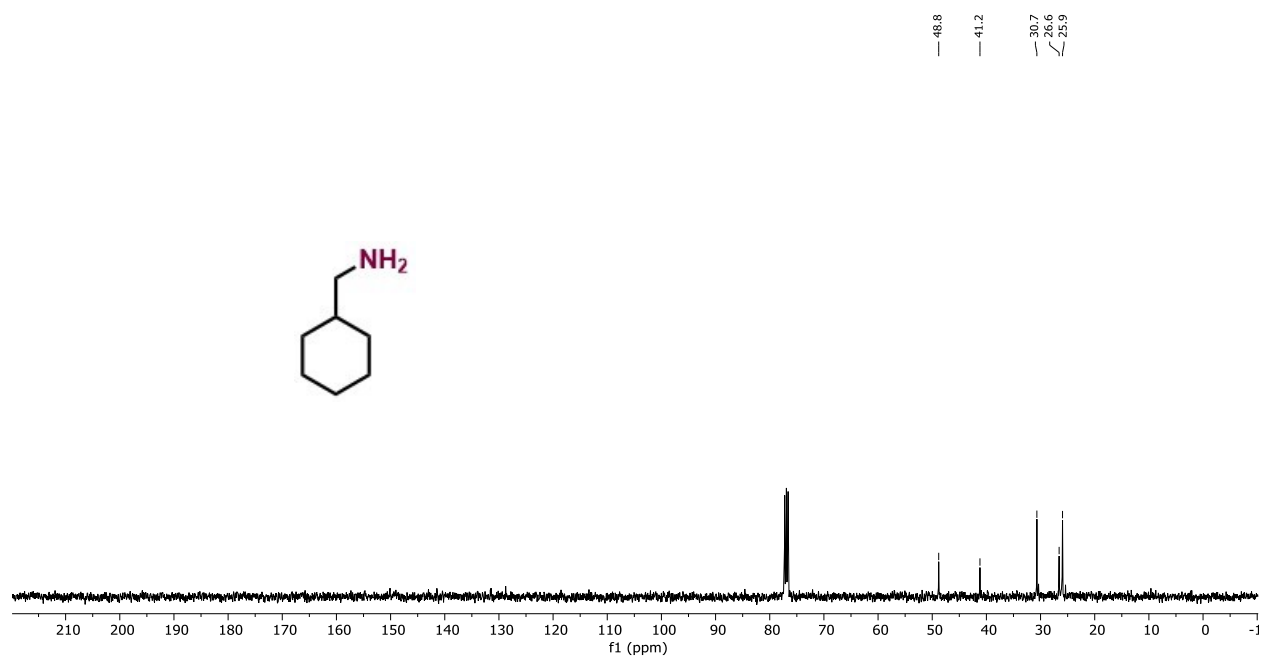

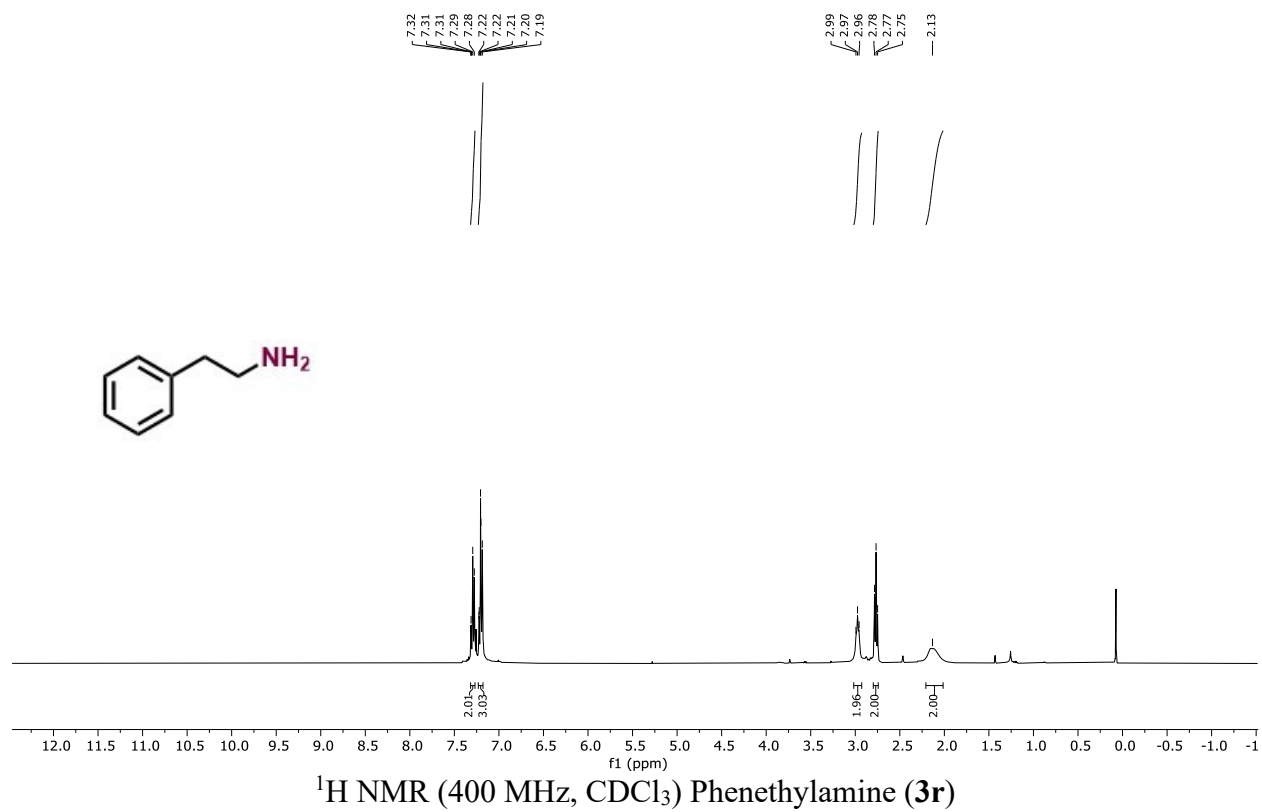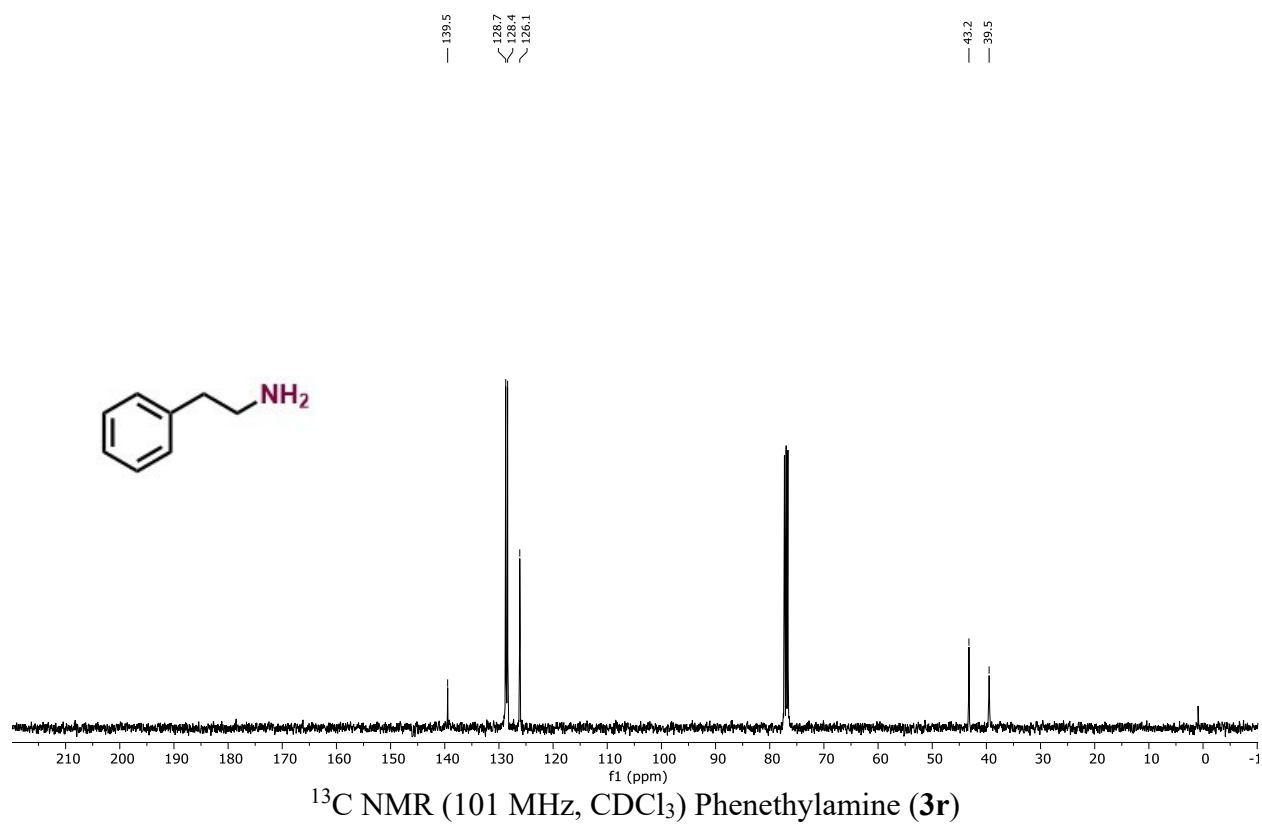

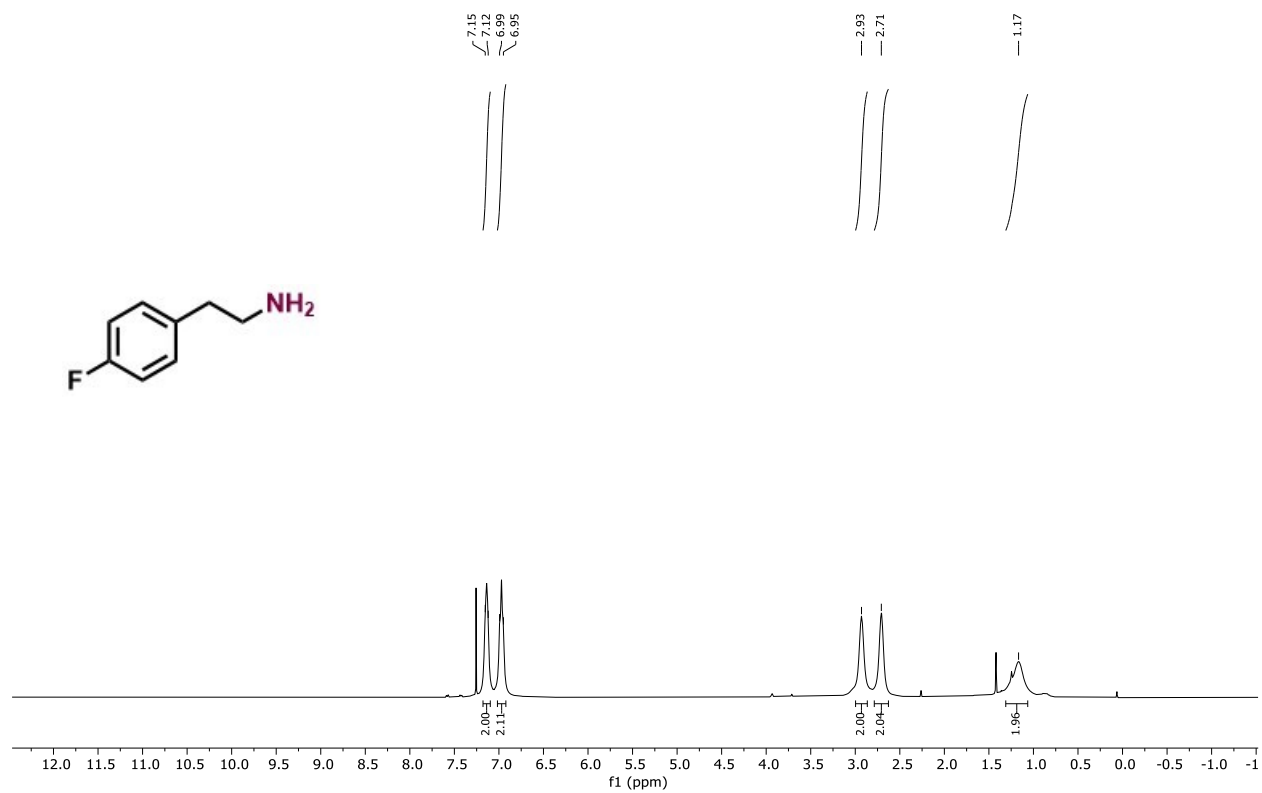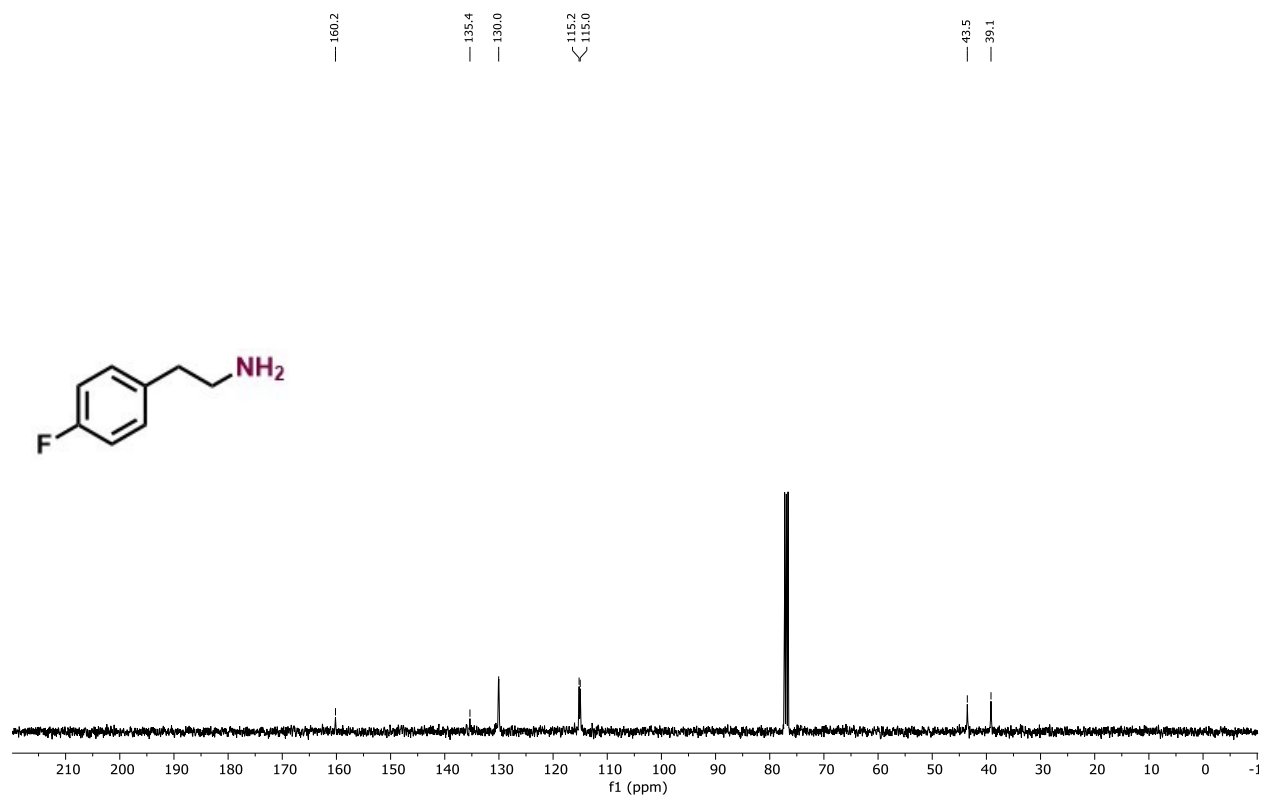



$^{13}\text{C}$  NMR (101 MHz,  $\text{CDCl}_3$ ) 2-(4-Fluorophenyl)ethan-1-amine (**3s**)

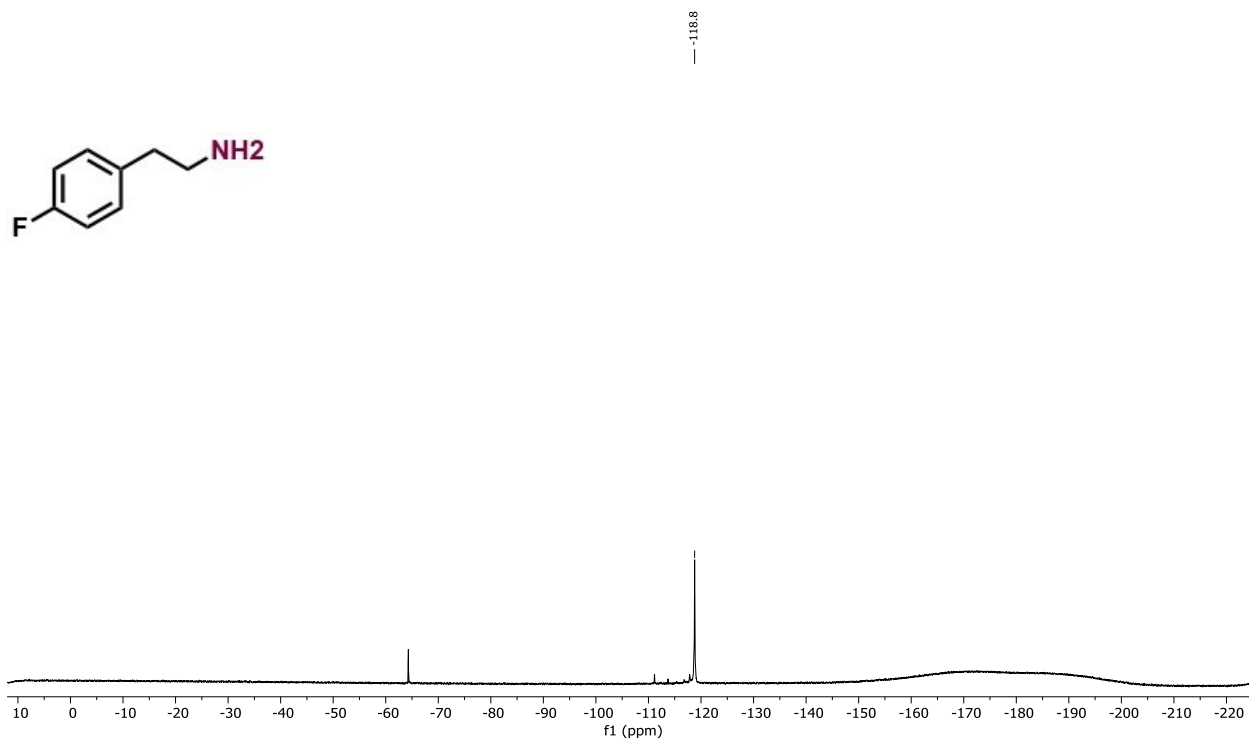

$^{19}\text{F}$  NMR (282 MHz,  $\text{CDCl}_3$ ) 2-(4-Fluorophenyl)ethan-1-amine (**3s**)

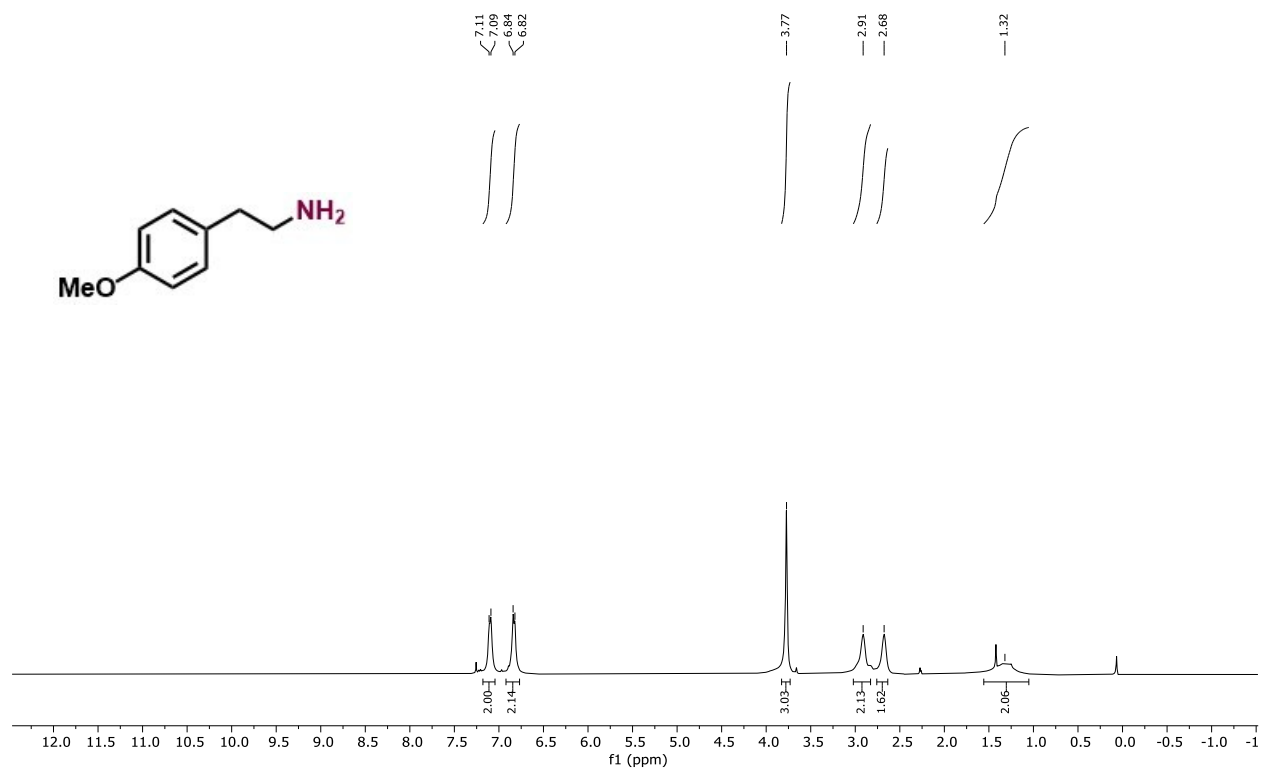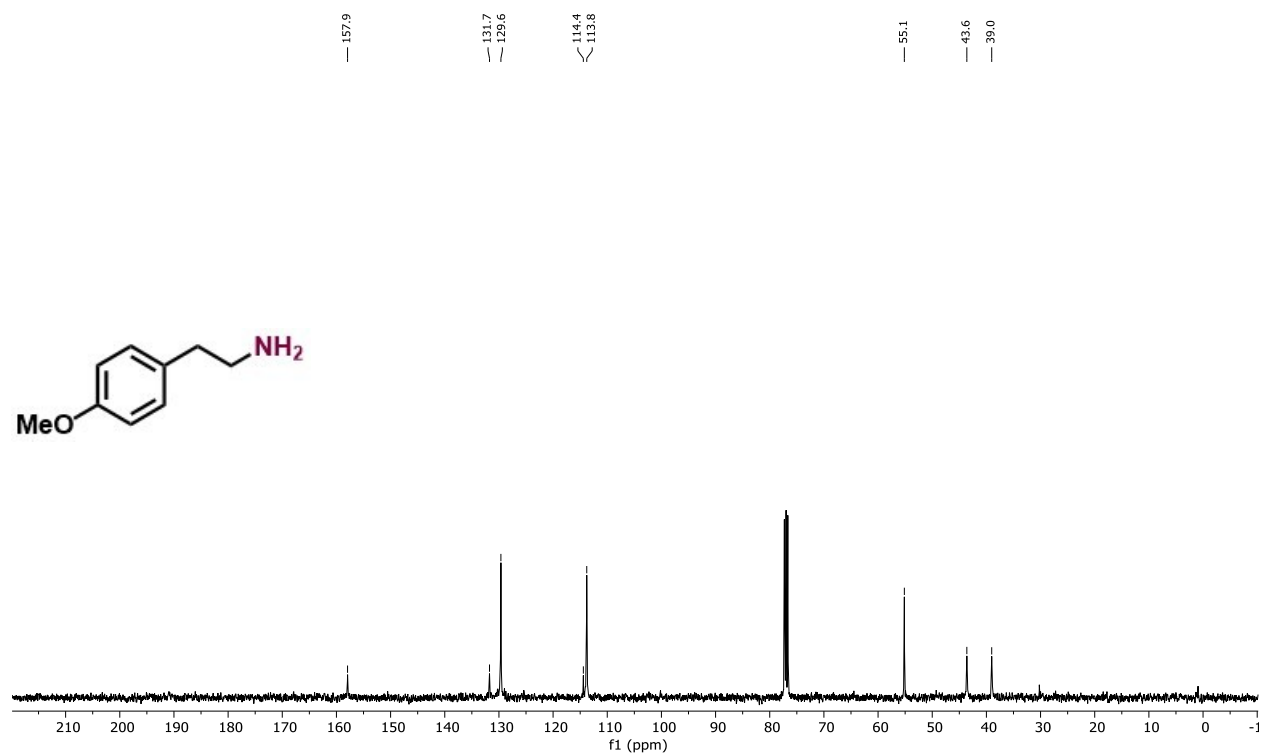

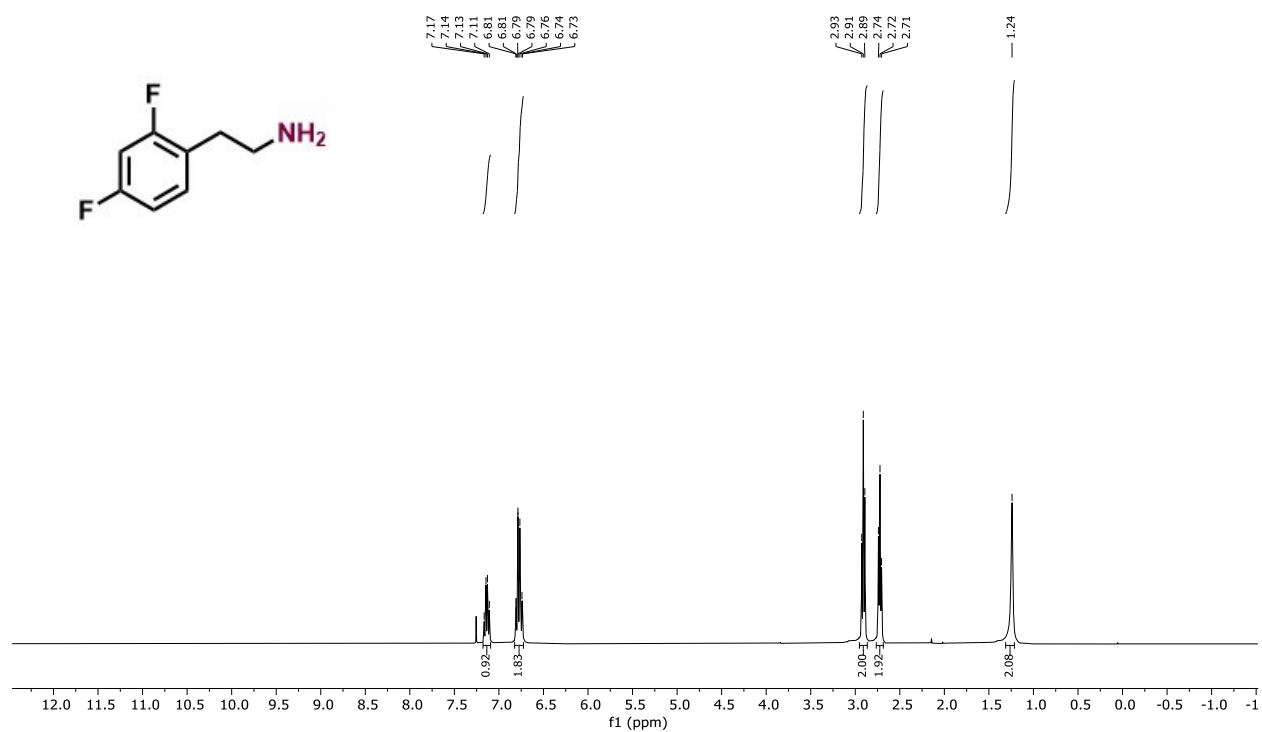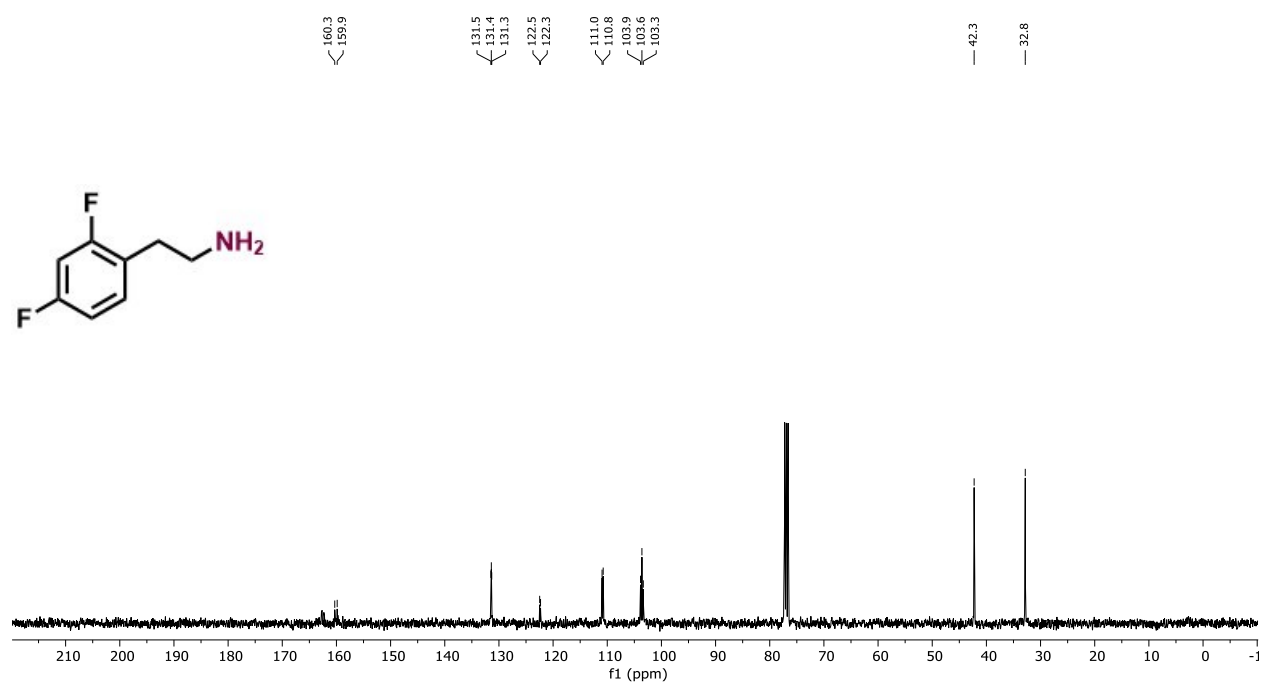

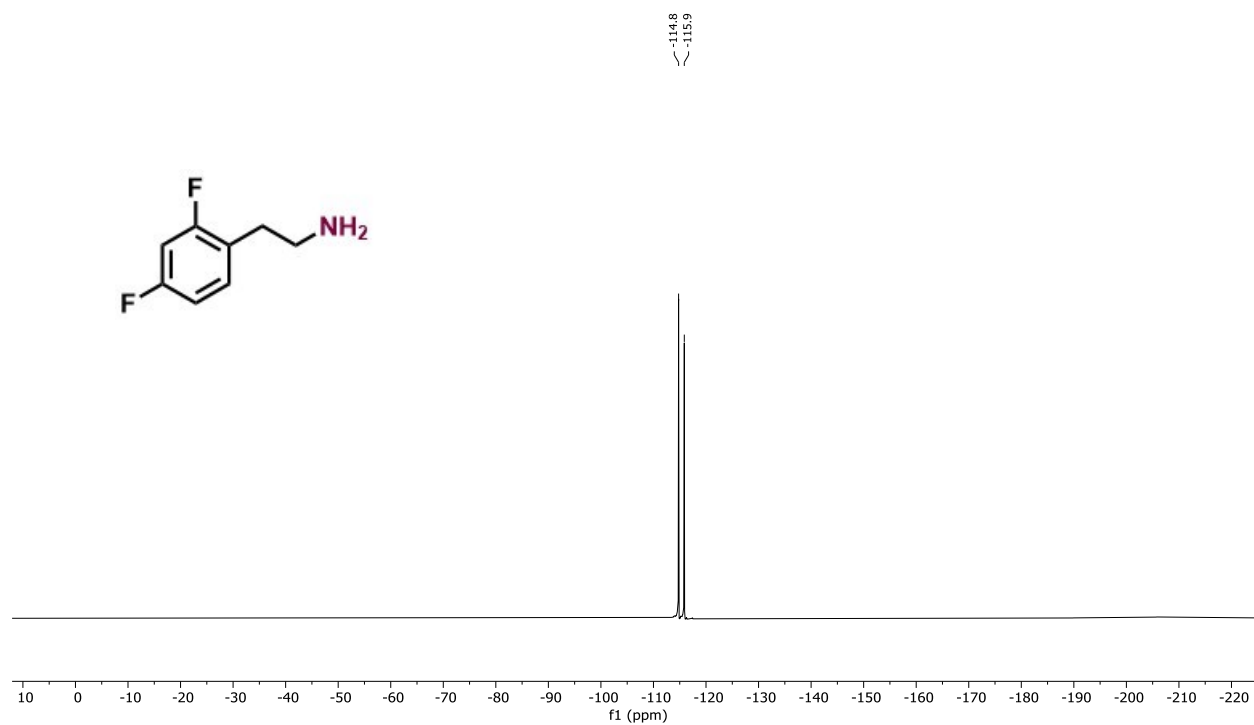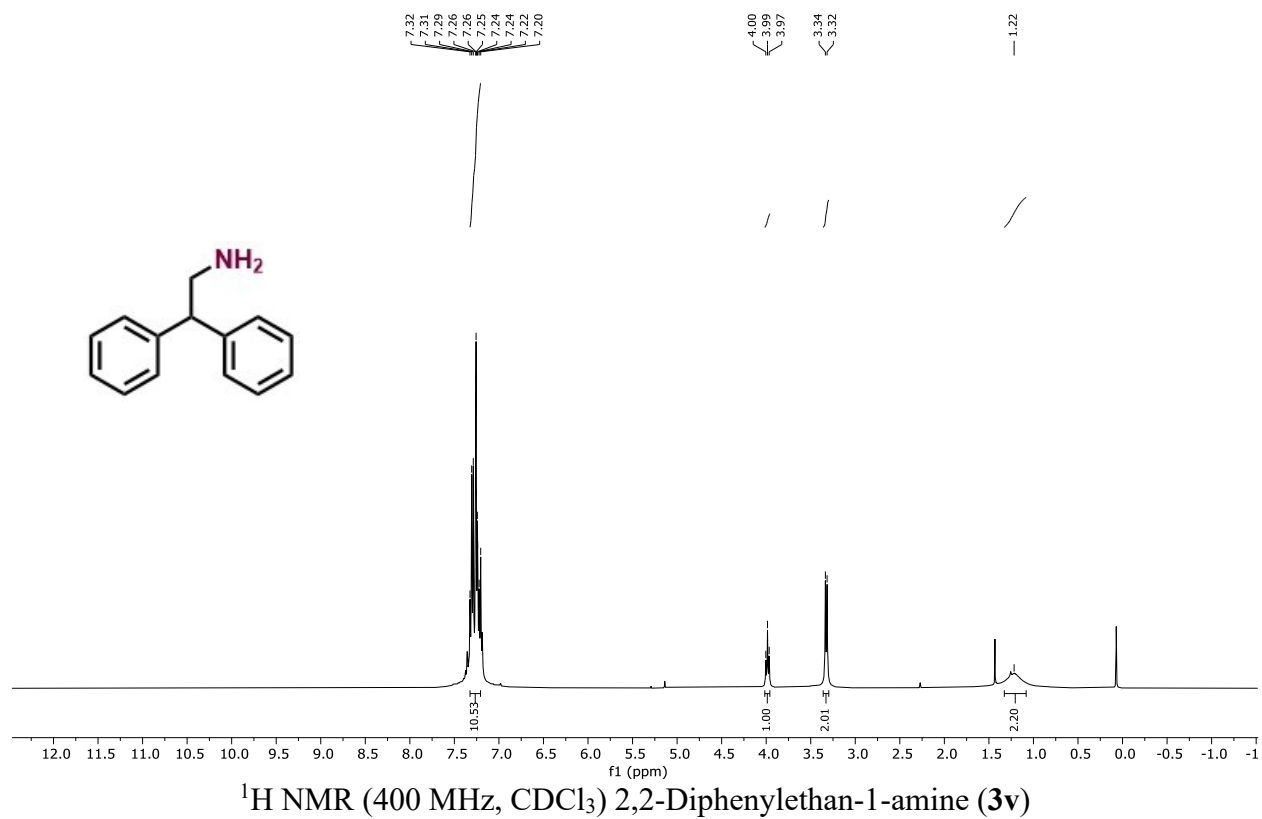

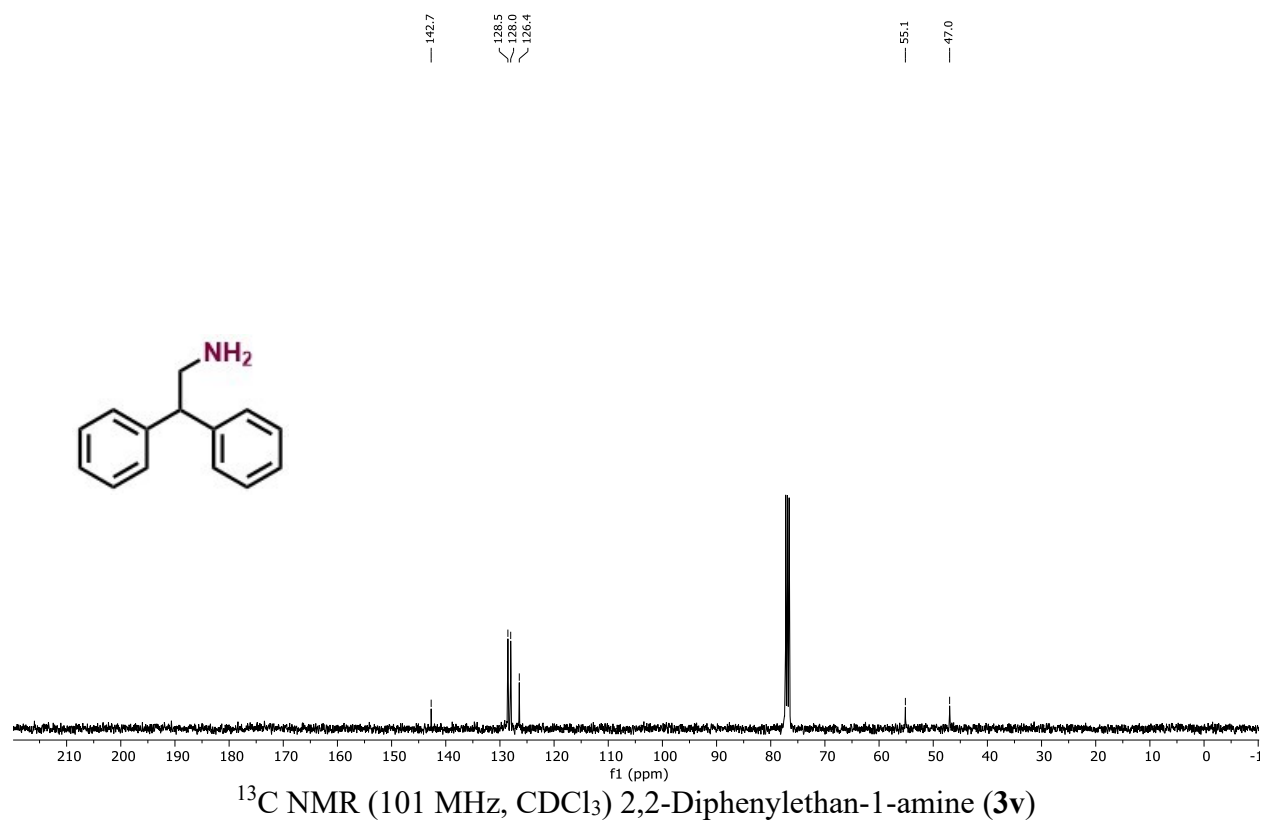

Supplement: s1 [file s1]
